# Supplementary material for: The Discrete Emotions Questionnaire: A New Tool for Measuring State Self-Reported Emotions
Source: PLoS One. 2016 Aug 8;11(8):e0159915. doi: 10.1371/journal.pone.0159915 (PMC4976910; doi:10.1371/journal.pone.0159915)
Supplement: S1 Data — (XLSX) [file pone.0159915.s002.xlsx]

## Sheet: sheet 1
desire_cond	anger_cond	satisf_cond	fear_cond	love_cond	sad_cond	anxiety_cond	disgust_cond	memory	emobest	emo2	emo3	emo4	emo5	vernac	sex	ethnic	age	anticip_theme	satisf_theme	attach_theme	blame_theme	nasty_theme	harm_theme	dread_theme	loss_theme
			1					I was in 3rd grade and we were walking back from our "special" class, I think it was music that day. We had to walk through the library to get to our classroom and when we were passing through we could see the librarian and another teacher sitting in front of a large tv screen watching the replays of 911. I could not exactly see the screen from the distance but I could see that it was something n…	Wonder	sad	confused	mature	comforting	confused	2	1	20
					1			I remember I had a dog when i was young, I was very close to tis dog. He followed me everywhere, slept next to me when i cried out from nightmare and was constantly there with me when i needed a friend. this dog even overcame large obsticles to stay alove, he was lost and returned, he had been hit with a car and disapeared and still lived. in the end he stayed with me for a long long life of a do…	Missing	Loss	Sadness	Pain	None	Sad	2	1	20			1					1
							1	The house next door is up for rent. I was outside smoking a couple days ago and this mexican guy comes to look at the house and asks me a few questions about the house. He had this giant growth or giant zit or something on his bottom lip. It was huge and looked like it was full of puss or something. He just kept talking to me and i tried not to look at it but you couldnt miss the thing, it was so…	Disgust	Nausea	Anxiety	none	none	dsgusted	1	1	35					1
1								I was working temporary for this job and they got bought by a bigger company. I was excited that I might get a job with this new company and get paid a lot more. I was feeling excited and was planning on things I would buy with the money. Thought about a car that I could get. I was so happy for those few days that I got the news about the sale. I told my friends about it and they got excited too.…	excited	happy	Joy	Anticipation	hope	excited	1	4	42	1
	1							One time a guy I lived with was a real big duecse. He thought he was hot stuff and his little pick up was a speed demon. He always tried to rev it up and stuff. One time my car was parked in a gravel parking lot and I noticed it had rock dings all over it. It had witnessed many times him doing donuts in the gravel and slings rocks everywhere. I knew it has him and when I asked him about it he den…	Mad	Furious	Ticked off	None	None	Pissed off	1	1	28				1
					1			I lost my father about 3 years ago. He was in the hospital by himself. He had been in and out of the hospital so much that I thought this time would be no different. But it was different. He died. I couldn't believe it. I still can't believe it. I am still devastated by it. I miss him so much. I hate that people have to die. It doesn't seem fair. There is deep deep hurt and pain. There is a sense…	devastation	hopeless	heartbreak	inconsolable	saddness	sad	1	1	35								1
			1					When I was ten I was in Weblos. That's the step between Cub Scouts and Boy Scouts. My Cub Master and the other dad's said they were going to take us to the lake and pitch us in. Teach us to swim. Sink or swim, they said. I can't swim. Had a serious phobia of water. I felt that they would kill me. I was sure I would drown. I was up all night, afraid for my life. I never went back.	Fear	Anger	Hatred	Terror	Panic	scared	1	1	33				1		1
							1	When my cousin died, I was standing in my father's closet inspecting a new gun my sister had received for her birthday. We were all gathered around talking about the present waiting for my dad to lock it up. My mother walked in and I remember my heart dropping a little when she said you will never believe what has happened. She then proceeded to give us the details and I felt numb, like it couldn…	numbness	shock	dread	disbelief	none	shocked	2	1	25
						1		One day I was walking down the street and a car accident occured ahead. Even though I was a fair distance away from the car accident, the cars continued to spin off the road and towards pedestrians. I had a strong emotional fear during this time because of impending physical harm to myself and others. Even though the inccident was quick, the emotional response I had was very great and left me in …	Fear	Apprehension	Confusion	Worry	Anxiety	frightened	1	3	20						1
1								It was when I finally had enough money save up to buy my first project car. I was so exited I had been looking for months to find the right car at the right price. When I finally found it I was ecstatic. When I finally got it home. I began to make an inventory of the part I would need and how much I would have to spend to get it finish. I also began to day dream of how it would look after I finis…	Joy	Excitement	Happiness	Alert	Pleased	Excited	1	4	28	1
					1			I was at Galveston, in the water park called pleasure pier. It was getting late and it was time to go home. However, there is no good cellphone signal there, so the option of calling her was not valid. I had to go inside the park to look for her. I stood next to this water slide that was wooden. I saw my sister and yelled out to her. As soon as i got her attention she saw me and turned towards me…	anger	unhappy	impatient	hurt	none	mad	1	4	19
			1					I was running late at night to catch the last train to the suburbs where I lived (I worked in the city); I saw several men watching me, heading after me with obviously some intentions. They knew I was trying to get in that train, and they knew I probably wasn't going to make it. I ran faster, they sped up as well. I was getting frightened, out of breath, and the train was already getting the door…	fear	hopelessness	anxiety	anger	none	scared	2	1	40				1		1
						1		My husband was having problems at work and was anticipating being laid off. One morning, they requested him to come into the office and telling him for over a week that they had no work for him. Deep down inside, I knew he was going to lose his job but I kept trying to have a positive outlook for his sake. My stomach was upset, I had a headache. I couldn't believe I was going to have to deal with…	anxiety	sadness	disappointment	anger	none	frustrated	2	1	28				1			1
				1				my first date with my boyfriehd. we just hung out at his house. had a couple beers, sat in the hot tub, talked for hours. I had never had that with my ex husband. we never talked about anything. it was kind of over whelming to hear a guy say whatever was on his mind and actually want to hear what I thought and felt. it was a great night that I will always remember. I left there feeling so happy, …	euphoria	excitment	happiness	over whelmed	nervous	happy	2	1	48		1	1
				1				I went on an incredibly fun camping trip when I was seven. We brought the bass boat along and we caught nearly twenty bass that we had for dinner. Camping was incredibly fun	Joy	Companionship	Love	None	None	Happy and excited	1	1	31
	1							I remember a time I went on a date with a female. Our first date went well and I couldnt wait for the second date. Well I came over that second time and found out she had a fiance who proposed to her that day	Bad	horrible	shit			pissed	1	1	25			1	1				1
1								I was appealing a decision against me in a sex discrimination lawsuit. The lower court judge was very biased and the opinion she wrote was drivel. I had just finished writing the appeal brief, and, exhausted as I was, I was sure I had won all or most of my points. I was certain that I had discovered the opinion's devious tactics and addressed them appropriately and that I had expressed myself ade…	confidence	joy	pride	satisfaction	contentment	glad that I did this. I know I did a great job, especially under the circumstances.	2	1	57	1			1
				1				I remember the first time i saw his piercing blue eyes, and breathtaking smile. He was unlike any person i had ever met. He was the first person in my life that seemed to see me for who i was, and he loved me. He said he didnt want anything serious but i felt he was just protecting himself. We talked about many things, and i felt so content and at peace. All my worries no longer existed. Its very…	Clarity	Joy	love	fulfilled	peaceful	blessed	2	1	39			1
						1		The incident in mind is getting an eviction notice at my last house. It was a two week notice, and I knew I could not come up with enough money in time. It was very stressful and I was worried because I didn't know what I was going to do to make sure that my family did not live on the streets. It made me feel guilty and like I was not living up to my responsibilites as a provider for my familly.	stress	pressure	guilt	obligation	irresposible	stressed out	1	1	30							1
					1			The time when I lost my dad to a heart attack. It was the most devastating even in my life. I did not realize how love plays an important role in the human mind. My dad was very strong and very caring. Firm as an bull. I miss him and it hurts me to this day knowing that I cannot see him like I used to and don't understand why he cant come back to me. I have moved on to live life cause life goes o…	sadness	lost	torn	upset	bitter	lost	1	4	39			1					1
							1	I was at the Port Authority Bus Terminal in New York City. I saw what was not exactly an upstanding citizen, more like a hobo, had defecated all over himself and was walking around the terminal near me. I could smell it and I was absolutely horrified that such a hideous act was being fulfilled in such a public place. The smell made me gag and I cautioned myself as far away from the person as poss…	Disgust	Horror	Shock	Nauseating	Repulsion	disgusted	1	1	22				1	1
					1			My mother had been in the hospital for about a week. The doctor could only find a slight urinary tract infection and some dehydration. We knew that my mother had many serious health conditions. The doctor released her even though we protested as she seemed very very weak. By the time my daughter and I got her home, she was incredibly weaker than before. We called 911 and she had to go right back …	devastation	distraught	broken	hurt	lonely	lost	2	1	59			1	1				1
		1						One of the happiest days of my adult life was on March 1st. My husband and I drove over 6 hours across the state in an empty, brand new mini-van. We were going to pick up our daughters. We were so excited to get them moved into their forever home. We were so excited to adopt them and form our family. It was such an amazing day. It was a cold morning, and watching them jump into our van and buckle…	Love	Hope	Joy	Excitement	Nervous	I am so happy and excited!	2	1	29		1	1
						1		I don't want the surgery in my stomach (uterus and ovaries removal). When I went to get the test report i.e scan report, I was scared to meet the doctor. but exactly, the opposite happened. She told me that we should perform the surgery as soon as possible. Undergoing the first surgery, that too I have to travel across the globe, and a near emergency one, I was too scared.	scared	confused	sad	afraid about the future consequences	unbelievable	worried	2	3	49						1	1
					1			I wen to florida to see baches with my falmily and we w seen clear water and the thip was great. the next day was raining very hard.	Beaches	weather	water	sun	warm	Funny	1	1	23								1
		1						Received money in the mail to pay for a passport. Got the passport because I met another person (from a different county) on line. He sent me the money because said I would have gotten one unless I met him. Was very sweet, I started crying. Nicest thing anyone had done for me in a long time. Was (am ) having money trouble and it was very useful. Very time I think about it get misty.	love	kindness	concern	appreciation	sweetness	blessed to know him	1	1	57		1
						1		It was the time that my husband and I knew it was inevitable he was going to lose his 13 year job. The economy had turned horribly and the owner could not keep the business. It had happened as we thought it would and we were devestated since we knew the options available were slim and none. We had a mortgage among other bills we had to maintain and we had very little hope for the future. We had t…	fear	anxiety	hopelessness	dread		stressed out with fear and anxiety.	2	1	50							1	1
				1				i remember when my "biggest crush for all seasons" sat next to me by the piano teaching me how to play some parts of the piece. His chest touches my right shoulder and it gave me a heart-throb. The feeling was so intense that I wished we kissed one another. I can smell his perfume that really gave me a strong turn on. I really had intense feelings for him. It all started in school.	cloud 9	almost dream come true	cure to my great longing	I wish i had it	all that i could dream of	heaven	2	1	19			1
					1			When I was younger my pet rabbit had died. I knew that this meant that I would never be able to see my rabbit again and that my rabbit had reached the end of her life. I was very sad and very young at the time and it was the first pet that I had that had died so it was particularly emotional because of that reason I believe. My parents didn't really care about the situation very much because afte…	Sadness	Loneliness	Empty	Hollow	Permanence	sad right now	1	1	23				1			1	1
					1			When I found out I had HSV, I felt my life was over. I got it from the guy who took my virginity and never called me back. I felt lost, scared and alone. I felt like I had lost myself. Like the person I was after that phone call would never be the same as the person after it. It was like a part of me died. The innocent, forever-optimistic, hopeless romantic me was gone and all that was left was a…	Rock-bottom	Loneliness	Fear	Confusion	Hurt	unconsolable. I just want them to call me back, tell me they made a mistake and for everything to be okay again.	2	4	23							1	1
	1							when I found out he was cheating I was angry, upset, betrayed, . I wanted to hurt them both. It was the worst day of my life. I wanted to die. I just wanted God to take me home , then and there.	Pain	heartache	anger	betrayed	hurt	upset that I want to hurt you both	2	1	47				1
							1	When I was 8 months pregnant, I was on my way to the movies with my husband. The two cars in front of us started drag racing between stoplights on a main road. After losing sight of them, we came over a slight hill, to a huge puff of black smoke and both cars wrecked. There was also a third car there. We pulled off to the side of the road and noticed both drivers of the drag racing cars okay but …	angry	upset	sick	floating	none	disgusted	2	1	31				1
							1	I went in my son's room and saw he had brought food in his room. It was a cup of old food who knows how long it had been there. It stunk so bad and was so gross because there was maggots in there.	ewww	grossed out	sickened	repulsed	nautious	grossed out	2	1	30					1
	1							One time, I tried to accomplish a specific task. I was anxious to get it done and over with, yet excited to participate in such a challenge. I needed to attempt to have a job interview with my now current boss. Someone told me scary things so that I was nervous and became extremely apprehensive. This situation derailed my previous positive attitude about this particular job interview.I ended up n…	disappointment	sadness	anger	negativity	irritation	upset	2	1	26	1						1
				1				CL and I traveled from the city to our cabin out in the Ohio Valley. It was winter and pretty cold. It was cold in the cabin so we got the fire going in the woodstove right away. We got into our bed and we were laughing because ti was so cold. We snuggled up really close and continued laughing. Even though we were freezing we were happy to be there in the forest and happy to have some time togeth…	joy	happiness	relief	excitement	anticipation	happy	2	1	53			1
				1				During my sophomore year of high school, at a party, I had my first sexual experience with a girl I had a huge crush over. I remember that going into it, I was incredibly nervous, trembling as I tried to take off her clothes. As nervous as I was, I had never been so excited in my life. I was feeling nervous that I wasn't good enough, that I wasn't doing the right things, that she would think of m…	nervousness	fear	excitement	jubilation	tense	excited	1	3	28			1				1
							1	I was about 8 years old. I was swinging with one of my best friends at the playground. We were going to see who could swing the highest and then jump off and go the furthest out. As I was watching go higher and higher he jumped. Upon landing on the ground his legs buckled and he fell forward motionless. I ran over to see what was wrong and his wrist bone was sticking out of his skin. blood everyw…	Frightened	Heart racing	Scared	pain	sadness	glad that wasnt me.	1	1	22					1
	1							I was driving down a highway and someone else cut me off and hit the front of my car. he was switching lanes and came in as he lane was ending out of no where and i tried to brake but hit him anyway. my car and his had major damage and we both suffered wounds though none fatal and nothign was broken. he drove aggressiveley, screwed over me and my car and just got a slightly higher insurance rate …	anger	confusion	sadness	anxious	nervous	mad	1	3	45				1		1		1
						1		A neighbor had been trying to reach me on the phone and frantically ran over to the house. I knew something bad must be wrong but hoped I was wrong. I began to panic and realized it must be about my daughter. The neighbor said my daughter had called her to get me. She had been in a bad car accident not far from the house. As we rushed to the accident scene I began to panic that she would not surv…	fear	panic	hysteria	hope	none	scared	2	1	73							1
							1	I was at a friend's house and we had just come in from outside to sit in her kitchen. I was probably sixteen years old. I have a horrible and irrational fear of bugs for reasons I can't explain. I was sitting with my legs tucked up in my lap and looked down to see this huge wood roach on my foot. My heart leaped up into my throat and I jumped up, I started gagging and throwing up, my heart wouldn…	terror	horror	revulsion	fear	anxiety	I am so scared I could throw up! I can't handle the fact that it touched me! It's just disgusting and awful and gross!	2	1	36					1	1
1								I can remember going in to a job interview at a location where I had previously held a job. I had been looking for work for quite some time and was really in need of money so this place was perfect. The call was all I was excited for because I knew I had it after that so when it came time to get ready to go into my interview I was really happy and excited and sure enough I got that job. It was aw…	ecstatic	excited	happy	overjoyed	manic	freaking happy	1	1	22	1
				1				I remember a summer when I went to a baseball game with my father. For my tenth birthday I went to a baseball game for the first time. This was a very good bonding and empotional experience for us. We talked a lot during the game and I feel like this experience made us closer. My father and I now share a very special bond around the sport of baseball.	Closeness	Happy	Relaxed	Loved	Joy	loved	1	1	22			1
					1			A time when my uncle died from brain cancer. It wasnt until the day of the wake that I truly started experiencing significant emotions. It was a very long day being that I was a close family member and so I had to stay all day for the wake. It was extremely long and dragged out. It was almost unreal that my uncle had died and I felt so many emotions. One of the most significant emotions i experie…	Anxious	Sad	Overwhelmed	scared	angry	messed up from this	1	1	22			1	1				1
					1			Well, when I was in high school one of my cats died. Normally this may not seem like a big deal to most people, but, I had had this cat since I was in 4th grade, so something close to 7 or 8 years. He had a rough life since my mom accidentally cut off part of his right front paw with a door, but, this event had made him closer to all of us and he spent much time socializing with us and became a p…	Anger	Sadness	Pain	none	none	angry at what that little punk did	1	1	23								1
						1		Last year I had the realization that I may have to pay more in taxes than I had accounted for. I realized that a deduction I'd had in previous years may not be there for the following year, yet I had been calculated my estimates taxes as though it would. I remember having a sinking feeling in my stomach because I'm genenerally very good with my calcultations. So when I realized I might be off and…	Dread	Panic	Fear	Unhappiness	Tired	Worried	2	1	37							1
1								I was dating someone and felt the relationship was going well. The physical aspect of the relationship was going well, and i anticipated a fine evening capped by sexual intercourse. I quite liked this person in many different ways and was looking forward to learning about them in greater detail. I felt optimistic that our evening beforehand would be full of the same sparkling conversation we had …	anticipation	positive	eros	amour	agape	excited	1	1	36	1		1				1
		1						One happy memory I had was getting my first guitar for a birthday, I was 12 years old and i had just gotten into music. My favorite band at the time was Led Zeppelin and I had always wanted to play like the guitarist, Jimmy Page. I took the guitar out of its package and played it, i was really bad at it.	Dreamlike	Happy	Ecstatic	Euphoric	Thankful	Stoked	1	4	20		1
							1	I was watching TV one day minding my own business, and suddenly this repulsive smell fills my living room. I look around to see what it was, and my dog had diarrhea on my floor. Not only that, but there was also blood in the stool. I promptly got up to clean the mess, but the smell was almost unbearable, and it was also impossible to wipe without getting it on my hands, as well. After doing so, I…	Worried	Disgusted	Curious	Anxious	Tense	freaked out	1	3	23					1
		1						When i left a job i was at for 7 years, i was afraid, happy, scared, nervous, and super anxious. I left and once i left my world opened up to how awesome jobs can be. Ive never been happier and enjoy my job to the fullest extent, I work with awesome people and a great crew who dont judge or take me for granted. Pay is great and so are benefits. Beats working retail	Happy	anxious	scared	nervous	ecstatic	happy	1	1	25	1						1
							1	There was a particularly disgusting customer that frequented our shop. He reeked and smelt as if he hadn't bathed/showered for days or weeks. He always hit on me and called me pet names, and asked me questions. He mumbled and I was torn between providing good customer service and running away. He typically asked for very obscure items as well, and it was difficult not only to discern what he was …	Disgust	revulsion	confusion	distaste	fear	creeped out.	2	1	26					1
1								There was a guy in one of my classes that I particularly liked. We had spent time hanging out with each other after class was over since we were both free during those times and we really hit it off. Unlike other people. there were not any strange or awkward silences when i first met him. We were able to talk comfortably. He made me feel relaxed, at ease, and happy. We continued this for 6 months…	happy	elated	content	excited	none	happy	2	3	20	1		1
							1	I was going to take out the trash and I saw a dead bird laying next to the trash can. It's body was in separate parts. I can't stand dead animals, it makes me super upset. I wanted to cry. It was all dried up from the sun. You could see the beat and legs and whatnot. It was disgusting and revolting. It made me literally sick to my stomach. It made me super upset.	DISGUST	SAD	UPSET	HURT	REVOLTED	disgusted	2	1	22					1
1								I was trying to get a job at the local Farm supply store and had went in for an interview. I finished the interview and thought I had done a great job. I knew several people who were employees a nd had a solid resume. I was told that I w would be hearing from them soon. I waited to hear from them but never did.	Disappointed	sad	stressful	anger	fear	mad	1	1	32	1							1
1								I anticipated a positive experience when my youth baseball team was about to win the championship game. It was intense because it was a long and difficult game, and it was a tie. It would require a lucky circumstance to win the game. There were some forunate instances, such as when one of my teammates hit a home run. The game was over when one of my teammates got lucky and was able to steal home …	excited	happy	nervous	none	none	excited	2	1	19	1
		1						I took the test for Pharmacy Technician. I found out early in the morning before going to work that I had passed the test. I was on my way to work when I got the mail from the previous day. I went back in the house and woke my husband up to tell him the good news. I went to work and was happy, singing and dancing. I made a sign and put on the window by my desk that told everyone that I has passed…	proud	happy	relief	thankful	excited	excited and proud	2	1	60		1
1								I was 19 and married and found out I was going to have a baby. I was worried because we really weren't finacialy up to par for a baby. I had several health problems and was also worried about the health of my child. At the time my husband was a carpenter for the union so the insurance would cover all the medical bills. That was a relief . I had gestational diabetes and they had to monitor me clos…	gestational	diabetes	baby	health	none	scared	2	1	49
1								I dated a very nice woman, and I thought she would be the right one for me. We would do many things together. We had fun doing these activities. I had big dreams about our future together. Then all of the sudden she thought that things weren't working out between us. And she wanted to be out of that relationship. Everything was crushed, I felt. My hopes were dashed. I couldn't seem to move on wit…	SHOCKED	SURPRISED	DISCOURAGED	WASTE	DISAPPOINTED	upset	1	3	38			1					1
				1				This is about the time I proposed to my current fiancee. I had sat everything up and it was supposed to happen at dinner with the server picking up the desert tray and the ring would be there. So as we ate dinner I got nervous and then more nervous til desert came when she picked the lid up she didn't notice it at first but then she began to cry so I knew she saw it. It was the happiest moment of…	love	adore	admiration	passion	dsire	nervous. I can't wait til the desert gets here.	1	1	39	1	1	1				1
1								Its really hard for me to interpret my emotions in general. Often when i feel something welling up inside me I either suppress the feelings or I force myself to deal with it in a destructive way (self mutilation, drug abuse, personal defamation.) After reading the text i can't honestly say i know how i feel. Like i said it's very hard for me to interpret and understand how i feel.	Confused	bored	tired	pissed	none	PISSED	1	2	28
1								I was needing to see if I could get some much needed financial help. I have some health issues and this was very important. I went through the process to try to get this help, filled out forms, and went through the entire process. I was expecting this thing to turn out for me. I was very excited thinking that I would get this much needed money to pay my bills and get some much needed freedom and …	anticipation	hope	excitement	want	none	Nervous	2	1	41	1
							1	I dropped my kids off at daycare and the dumpster outside smelt horrible. It was so bad if I didn't have to go to work I would have taken my kids out of the daycare. It smelt worse than rotten eggs. I was passing by it and wanted to throw up before the smell even got really strong.	nauseated	disgusted	worried	in a hurry	gross	disgusted	2	1	33					1
		1						The first time my daughter walked was one of the most emotionally engaging experiences of my life. It was the moment she went from baby to little girl in my mind. Her sense of freedom and excitement at the prospect of walking sent a smile upon her face and filled me with utter joy and exhilaration. It was the first time I felt like a true father to a daughter, as opposed to being a father to a ba…	Joy	Exhiliration	Pride	Thrilled	Happy	proud	1	1	30		1	1
		1						It was my wedding day. This was the man I had thought I would never find, the person who was the other half of my soul. We knelt before the rail and said our vows, and both our hands were trembling hard. I felt as if I were going to pop out of by body somehow, as though I might jump out of myself. I was a recent convert to Episcopalianism, so I did not know all of the ceremony. I was shocked, as …	Rapture	amazement	gratitude	joy	love	overwhelmed with this powerful experience	2	1	60		1	1
1								I have been in the same position at my job for over 5 years and a new opportunity was available. I have felt complacent in my current position and longing for something new. A prior colleague of mine had moved on to the position I was seeking and emailed the hiring manager and her direct supervisor an outstanding recommendation for me. I submitted the application carefully and with enthusiasm tha…	Anxious	Excited	Joyous	Thrilled	Overwhelmed	Excited	2	1	27	1
							1	Basically, a friend of mine helped us to find an apartment. Rent was extremely cheap, but when I moved in the place a mess. So bad that I couldn't even take a shower. Every time I walked into the bathroom, I'd shiver with disgust. So horrible. I really was angry at my friend at first for recommending such a crappy place, before I realized that it was as much my fault as it was his. I should've in…	Disgust	Anger	Understanding	guilt	embarassment	disgusted	1	1	21				1	1
	1							It happened when I was in junior high school and was riding the bus home. For some unknown reason, my friend flipped-off someone who was driving by. The bus driver saw her do that, and yelled at her. Then the bus driver pulled the bus over to the side of the rode, walked up the aisle, and started yelling at ME for doing what my friend had done. I felt embarrassed and completely humiliated. It was…	humiliation	embarrassment	shame	helplessness	fear	humiliated and angry.	2	1	55				1			1
						1		I had problems with the discs in my neck and was afraid that this would prevent me from skydiving, which is one of my biggest passions in life. Would I ever be able to jump again? Would my neck be ok if I would jump again in the future. I was very upset and hoping that things will work out and I could do again what I loved most. I was scared to go and see the doctor, I was scared about the diagno…	fear	sadness	anger	hope	depression	upset and scared	2	1	60	1						1
				1				when i went to the abortion clinic with my girlfriend was a pretty emotional experience. There were so many people there. It was early in the morning and we had drove all the way from knoxville to memphis. It was a long drive. We rode all night long. We were so tired when we finally got there. There were protesters outside of the clinic. Maybe it was a sign for us not to do what planned to do. I …	fear	anxiety	regret	withdraw	sadness	stupid	1	2	25
						1		I was caught in a lie as a child - nothing major really but it seemed like it at the time. I was extremely apprehensive about what was going to happen to me when I was caught. I was sure that I was going to be caught so all of my thoughts were racing and I was trying to think of any possible way to get out of the trouble which I knew was coming soon. I could feel what I would later learn to descr…	Fear	Panic	Apprehension	Pain	Torture	distressed	1	1	24						1	1
						1		my roomate had an abortion in my dorm room. this was my firs tyear in college and she had a terrible boyfriend who never wanted to wear condoms and she didnt want to talk birth control. she lied to her boyfriend about the abortion saying she had a miscarriage and stuff. she got into a huge fight with the mom too and they eventually broke up	ANGRY	sad	happy	disgusted	asahmed	frustrated	1	3	18				1	1
		1						I GOT MY FIRST and STILL ONLY motorcycle. My father just recently became promoted to CAPTAIN of an airline he flies for, and he was feeling generous. He told me i could find a motorcycle to get, as i had always wanted one, and he'd get it for me since he's very much into fast cars and fast thing in gereral. / / the bike was a honda cbr600rr. SO FAST. i went to pick it up, and my father paid 3800 …	AMAZED	awe	flabbergasted	humbled	elated	FUCKING HAPPY	1	1	27		1
1								An emotional experience I had was when my uncle passed away several months ago. It was very unexpected and I had been anticipating seeing him at a family wedding on the night of his death. While emotional, my family supported one another and we were able to overcome the tragedy of my uncle's death. I was very upset and I understood that lives come and go and the world moves on.	sadness	guilt	grief	unhappiness	distress	upset	1	1	20
						1		My grandma was diagnosed with terminal cancer in March. I knew she didn't have much time, but I was unsure of how much time she had left. I spent a lot of time crying, I just knew something bad was going to happen, but I didn't know when or how it would happen. I was so scared I was going to have to watch her deterioate over a long period of time. This did not happen quite like that. However, tow…	Sadness	Scared	Hurt	Devestation	Emptyness	frustrated	2	1	27							1	1
1								Well i was living at my house with my mom and dad. But i was wishing/ hoping to move in with my boyfriend of 3 year so i could be closer to him and see him all the time. This was a happy moment because i was coming up with different things we would do when i was living there with him. We would go out to eat , go to the park, and just be about to just watch a movie and know that he was hear with m…	Love, Happiness	compassion	strength	freedom	loyality	Excited	2	1	17	1		1
						1		I knew that my dad had been sick for a long time. He was a heavy smoker, and the doctor had diagnosed him with COPD about five years earlier. He was experiencing a terrible pain in his side. I suspected that it might be cancer, and that the doctors hadn't spent much time looking into it because he was so sick with COPD. But we finally talked the doctor into doing a scan of his lungs. I was at wor…	Dread	Sadness	Emptiness	Loneliness	Helplessness	worried about losing my dad.	2	1	45							1
	1							Last year, my boyfriend neglected to pay the rent on time. We had to move out of our apartment. We did not have a place to live. He stayed with his friend for a month and I stayed with my parents for a month. I felt angry and disappointed. I got really mad at him. I let him know that he let me down and I was not happy with the situation. When I got to my parents, I was depressed. I was not intere…	anger	embarassed	sad	disappointed	let down	angry	2	2	25				1				1
							1	My dog was sick one day, so she threw up all over the floor. I had to clean it up. I smelled the throw up and it was disgusting. It made me gag as I cleaned it up. I was able to get over it quickly, though. I tried not to smell it again after smelling it once.	disgusted	appalled	sick	annoyed	bothered	disgusted	2	1	22					1
				1				I was getting ready to play much first show of a big tour with my band. We had driven out to Maine from southern California to start the tour, so we were already pretty exhausted just from the drive out there. The University of Maine gym was empty at the time, but a huge line was beginning to form outside. When we arrived, I felt pure excitement. I couldn't believe that so many people were waitin…	Anxiety	excitement	curiosity	confidence	comfort	excited	1	1	26
1								I was living with my parents, and I was in a long-distance relationship with my boyfriend that I had met online. My parents and I were fighting a lot, my boyfriend and I had visited each other a few times... and we were finally planning to move in together. I was finally starting my real adult life. He was finally taking me away from this hell-hole. We were going to spend our lives together, inde…	hopeful	joyous	excited	loved	happy	EXCITED	2	1	21	1		1	1
						1		I knew that I was going to fail two of my college classes in my final semester, and I was dreading the outcome. I knew that failing them would drop my GPA and have negative consequences. I had major assignments pending in these classes, which I could not get myself to complete even in the face of these consequences. I instead hoped that somehow it wouldn't happen, and agonized over the prospect, …	dread	anticipation	nervousness	fear	defeat	stuck	2	1	22							1
						1		My family was driving back from my mother's house to our own, and we were running out of gas. Getting stuck on the side of the road with my two small children was inevitable. I felt a strong emotion of worry about how my kids would react. I felt guilt over not preventing the situation. I feeltfatigue in anticipation of the long walk it would take me to get help.	worry	anxiety	fatigue	guilt	depressed	worried	2	4	36							1
							1	When I was in high school in West Africa, I used to take public transportation to school about 2 hours away from my home. One particular day, I was heading home and on the side of the road laid the body of a man who appeared to have been dead for some days. Back in those days, thieves were beaten to death and left on the side of the road to die and sometimes for some strange reason, it took the p…	Scared.	Frightful	Disgusted	Sad	Empathy	sad	2	2	40					1			1
				1				I was living in Wisconsin in the all-girls' dorm. My "crush" drove 1.5 hours to see me so we could "hang out". My roommates were studying, so we headed to the dorm lobby to chat. We spent the entire time joking around and laughing. We stepped outside to say hello to a friend. It was cold, and he wrapped his leather jacket around me. I still remember the smell. Leather and his cologne. It smelt li…	Euphoria	tickled	joy	shy	hopeful	confused	2	3	31			1
							1	I was helping a friend paint some primer on some walls. We were preparing to do so, with steps such as laying down drop-cloths, moving items, and taping. I was taping some border, and my friend told me my quality was lacking, and I felt that I did a perfect job. Because of this, I was pissed. I told him to do the taping himself, because apparently my quality is lacking.	pissed	anger	hate	disappointment	bewildered	pissed	1	3	18
							1	When I went to my friend's house, the dog was barking and it is not in clean the dog's dung was inside the living room smells irritate. I told my friend to clean his house as well as possible because it could affect the daily life activity and it would make disease for the children who are playing with the dog. Dogs should clean and keep tidy when it is inside the home that makes our life and the…	Irritation	Frustrated	Sad	Dependable		Irritated	1	3	29				1	1
						1		Several years ago I was working outside near a beehive. There were bees buzzing near me and I was initially not startled. However, the frequency of the approaches and the closer they came to me, the more alarmed I became. I knew they were eventually going to attack me, so I panicked. I ran away but unfortunately I was unable to evade their stings. I had roughly seven or eight bee stings and the p…	panic	fear	regret	helpless	anger	scared	1	1	31
				1				I was at a party for one of my friends. It was fun and I liked hanging out there. I knew some people there and I liked it a lot. I had a good time there. I talked about some things and it was fun doing it. I liked the party and going to it. I had a good time there and would like to stay. I liked to meet the people there. I thought they were doing some cool things and talking about things I liked.…	happy	fun	good	nice	like	happy to be here	1	1	31		1	1
				1				My girlfriend was very sick and in the hospital for eight days. During that time, I stayed wit her at her side. I felt very attached to her and I had deep feelings of wanting to take care of her on one hand, and not being able to help her as much as I wanted to on the other. I was there for her, but I am not a doctor, so I felt a little helpless. But i wanted to give her as much support as could …	Love	Careing	Useless	wanted	helpless	much in love with her.	1	1	61			1
	1							I was in my art class where a bully who often picked on ne sat in a desk nearby. I was asked to go get a se of books for students at my table. I was apprehensive because the bulky often picked on me. I could feel she was getting ready to do something. I decided to not be chicken shit and go. I got the books. As I walked back I felt something hit my head. I turned around an saw my bully with a bla…	Anger	Apprehensive	Annoyed	Determined	Humiliated	Angry	2	4	26				1	1		1
							1	I smelled someting awful. I had to locate it and when I did it came from the Men's bathroom. Somebody had just finshed using it. Instead of putting the used toilet paper in the toilet and flushing, they put it in the trash can next to the toilet. It was horrible. So I held my breath and bagged up the trash and took it to the dumpster. That was awful.	disgust	anger	confusion	repulsion	sickness	disgusted	1	1	33				1	1
					1			I had called the cops on an unruly daughter. When they arrived, they realized that there was a warrant and I was taken into custody. As I left, I took off my mother's ring. When I returned to the apartment after a week of incarceration, I realized that the ring was gone. And I could not even start to find out who had taken it. It was awful that I was trusted with the ring after her death and I wa…	shame	distrust	paranoia	anger	sadness	stupid and careless	2	1	43								1
					1			I was five months pregant with my first child. It was going to be a boy which is what we wanted. I had very paid morning sickness during my whole pregnancy. What I did not know is that in my family history the cord wraps around the next of the fetus anytime during pregnancy. Of all things on my birthday I ended up in the hospital and found out that the fetus had died inside of me and I also almos…	terrified	miserable	upset	angry	worried	sick from the blood pressure going down to dangerous levels. I don't know what I should do next.	2	1	51
						1		I was at the train station with my husband. We were in line to pick up tickets we had ordered online. When I got to the window, the woman claimed that she couldn't give us the tickets. This was all happening in a foreign language, so I was very confused. I finally understood that the train had already left. I still didn't understand because the train wasn't supposed to leave until 11:00. This kep…	Anxiety	Shock	Disbelief	Disappointment	Sadness	stupid	2	4	25							1
							1	I was psychotic and I saw god and angels and the earth mother. I was overwhelmed with emotion. I remembered all I went through the other day and just was crying and reflecting. It was a very painful but also insightful time in my life. I am glad I came through it and was glad that I experienced it. There is no way to tell if it was real but there was definitely some truth in my delusions. Other p…	joy	anger	fear	love	power	happy	1	1	29
1								I was looking forward to getting a pay raise at work. I knew that my 1 year mark was coming up soon, and that I would be evaluated at that time. My evaluation would determine the amount of the raise. I was constantly putting out extra effort to get the best evaluation possible. I really wanted a high pay raise and was excited over the possibility of receiving one. I was already preparing a new bu…	excited	happy	anxious	jittery	glad	excited	2	1	24	1
						1		I was working in a company where two executives were feuding. I had been told by each that I was to do certain tasks and to not tell the other. At one point, I had done some stuff that I knew that the other would be furious about when he found out (mainly because he had not been consulted, not that the actions were inherently bad). At one moemnt, it dawn on me that the second executive was going …	dread	anxiety	fear	humiliation	guilibility	stupid	1	1	43				1			1
		1						Recently I had an experience where I was convinced that my current romantic partner would not compromise on something that was important to me. I was out of town for a month and had been unable to see him, so I didn't know for sure how he would react but I felt sure that he would probably react badly if I told him it was absolutely necessary that he change on this issue if we were going to stay t…	Happiness	Relief	Openness	Love	Release	Relieved	2	1	23		1	1
			1					My adult daughter was being stalked by a man she had dated. He threatened to kill the entire family and had been seen parked outside our home. We were very scared and called 911. I did not know fully what he was cspable of. I was very afraid for myself and family and was prepared to do whatever to protect us. The police came which was a huge relief. He was found outside or home with, gun, newly p…	fear	rage	concern	anger	anxiety	scared	2	1	55				1		1
				1				My experience was when I first realized I was deeply in love with my soon to be wife. I felt waves of intense elation like I was under the influence of a powerful mind altering drug. My flesh got goose bumpy and chills ran up and down my spine. I still periodicaally feel a similar way sometimes.	elation	joy	happiness	lightheadedness	none	fucking happy	1	1	51			1
				1				I dated a woman a few times. In early last year, we had our first intimate encounter. It was then that I started to fall in love with her. It was not so much the physical aspect, I cherish the warmth, the tenderness and the happiness that we both shared from that monment. When I was holding her, I realized that she was someone I could see myself with for a very long time. It was a beautiful momen…	Fondness	Careing	Respect	Happiness	Intimacy	Excited	1	1	47			1
			1					Well I was a freshman in highschool about 7 years ago when a bully came up to me after class one day and pushed me against a wall, then punched me in the face. I was really scared and surprised because it was for no reason and I had never been hit before. I was surprised that it didn't hurt at all and honestly I barely remembered it or the feeling. It honestly felt like nothing. I felt obligated …	fear	nervousness	courage	anger	none	pissed off	1	1	20				1		1
1								I am a salesperson and was counting on a particular piece of business closing in my favor. I learned the client went with another company and felt that they strung me along and only used my experience and expertise and then went to a competitor who simply offered a lower price. The customer made a bad decision and wasn't respectful of my time. I would have rather not engaged them in the first pla…	rage	helpless	sad	unhappy	none	mad	1	1	48				1				1
	1							At 18 years old, I entered a relationship with a man who turned out to be abusive. Mentally and physically. He started out as emotionally abusive and it escalated when I became pregnant. One day while driving to diner he got extremely angry about a guy he saw me talking to and started punching me and telling me that he was going to kill me. I was 6.5 months pregnant. He ran red lights, not allowi…	PAIN	Sadness	Anger	Disbelief	Fear	scared	2	2	29				1		1
							1	I was on a train through manhattan bored one day looking through a window. I was just normal at this point. Until I had something pass my vision in an instant that would change my emotions instantly. I saw a guy holding a girl over the end of the train platform towards the street. It was about 40 feet of a drop. I felt very confused and angry. I didn't know what was going on except that it seems …	Anger	confusion	wierd	none	none	pissed	1	1	24
					1			the experience was when dominos delivery driver turned in front of me while I was going straight through a green light.it was awful I had my girlfriend and dogs in the car.my car was totaled my girlfriend was in pain and my knee was bleeding.of course the other driver had a huge SUV Ford Explorer and all I was driving was a small Honda Accord. I really love that car and it was gone for ever.not t…	irritation	angry	sad	worried	dumbfounded	pissed off	1	1	25								1
						1		I remember an event years back in which a co-worker was causing problems at a job. He had put me in a position that made it look like I was the problem and was turning people against me. It became clear after some time that I was most likely either going to be fired or going to be forced to quit because of his actions. I tired to repair things the best that I could, but eventually it was clear th…	Anger	Grief	Betrayal	Sadness	Stress	angry that he did this to me	1	1	31				1			1	1
						1		i knew i was about to lose my apartment and have no where to go i knew i would have to go to a shelter.. i was very sad confused and angry... i ended up bing very depressed to the point i cried everyday up to the time i ended up at the shelter i was anxious to find work bugt couldnt i felt like a failure and was very embarrased and it felt like my world was ending and i really couldnt see pass th…	depressed	sad	angry	anxious	worried	sad	2	1	43							1
					1			It was back when my grandfather died, I recall feeling not too strongly at first but when I got to the funeral and viewed him in his casket, that right there triggered my feelings I believe. It's like it wasn't real until I saw him. The finality of it set in; the realization that we would never again play catch or sit in the back of his truck with him.	Powerless	Sad	Helpless	None	None	Powerless	1	1	25								1
							1	I once came upon an old man who I could tell was an advit smoker. When I got face to face with him I saw something that will haunt me the rest of my life. Out of his throat was a talking mechanism the helped him to speak. His whole face and throat area was very scary, due to him having battled cancer for so long	fear	scared	life threateninng	sorrow	confusion	sorry to see this individual, and can't imagine the life he is now having.	1	1	55					1
			1					In middle school, a kid intentionally bumped into me in the hallway. I was angry with the situation. I went back to where he was and bumped into him to show that I wasn't afraid of him. Seconds later, we said nasty things to each other and almost fought one another. But in the end, we did not fight at all. We both calmed down and made up.	Anger	Regret	Upset	Unhappy	none	pissed off.	1	6	24
						1		The girl that I was really attached to at that time was giving me signs of no longer wanting to be with me. I could tell that something bad was going to happen, but I ended up never actually doing anything about it because I couldn't exactly figure out what to do. One day, she ended up coming up to my door and finally ending what we had. It didn't hit me as hard as I thought it would, at least no…	Depression	Sadness	Regret	Pain	Grief	sad	1	4	19							1	1
				1				A great aunt of mine, I was driving her back to Wi from Fl, we had a flat tire and no one in site on the road.A man pulled up in a semi to help, he fixed the tire and when I looked back to see him, he was gone. My experience with an angel.	Gratitude	thankfulness	belief	praise	awe	awestruck	2	1	70
1								No goal has been more important to me than graduating from college. The moment leading up to receiving my diploma was incredibly surreal. I had dreamed of this moment for so many years and yet I was completely unprepared for the simplest of tasks, walking up the aisle. My heart racing, palms sweating, and a mind clearer than its ever been was how I felt leading up to that important moment for me.…	Elation	Excitement	Anxiety	Happy	Nervous	awesome	1	1	26	1
							1	There are barn cats that hang around my house out here. One of the cats had kittens this spring. I had to save the kittens because the other cats were trying to eat them. One day I went to town to do chores, and when I returned the kittens I had worked for weeks to save, were laying on the porch in a little pile and all of them were dead. I had to pick them up and dispose of them. I am not sure w…	Sadness	upset	nauseous	frustrated	depressed	sad to lose those kittens	2	1	57					1			1
		1						I just realized that I had started to lose weight again. I am 30 years old and up until the age of 25 I was a size 2 and at times I loved it because i never had any body rolls but at the same time i didn't have any curves. I have taken adderall since I was 12 years old and it just didn't seem to work as well anymore. at least for the losing weight aspect of it. I also was less active I had gradua…	Relief	accomplishment	success	satisfied	knowledgable	relieved	2	1	30		1
				1				I remember going to rye beach this summer. The beaches were white and clear. I remember the oceans waves. This invoked intense serene feelings in me. This also invoked a strong and peaceful feeling. It was very peaceful sitting on the rocks in the ocean and watching the waves. I was extremely at ease and did not have a care in the world. Sitting on the rocks put me in a deep meditative state. I e…	Peace	calm	serene	happy	at ease	excited	2	1	27
							1	When my dad was in the hospital dying of cancer. He was throwing up blood. The whole thing was horrible. I was so sick. When I got to the hospital the day he died, my mother had told the nurse not to change him because she didn't want my dad in pain. I walked it and told the nurse to get the bloody gown and sheets off my day. I just couldn't take that and the fact that he was dying. I will never …	horrified	anger	discust	sick	sadness	Pissed	2	1	45					1			1
1								Okay, so I'm remembering a time when on the job market and just finishing grad school. It was grueling finishing my dissertation and the job options for professorships were slim pickin's. I had some 'Job Talk' interviews at various universities, but nothing was seeming to pan out. My doctoral advisor did his first postdoc at U Pittsburgh, and got me an interview there, which went beautifully. I h…	jubilation	Excitement	Anticipation	Relief (was worried about not finding a job)	Grateful (Dr. Matthews was giving me such a great opportunity to advance my career)	happy, relived, and honored to receive this postdoctoral position!!	2	1	40		1	1
				1				It was at a music Festival. I had known this girl for a year, but never ahd musch time to spend with her as I live in the US and she lives in Canada. We both knew we had feelings for each other and on one of the days we actually got to spend time alone together away from our friends we came with, which sounds funny since we were surounded by thousands of people we didn't know. We shared our first…	Connected	Joy	Anxiousness	Pleasure	Happiness	glad I finally got to spend time with her.	1	1	32		1	1
			1					When I was in middle school, I was walking home to my aunt's house and turned a corner into a gate area. A kid, taller than me threw a rock at me and called me a faggot multiple times. I didn't know how to react and felt a surge of self-loathing and deep sadness at the boy's cruelty as he threw another rock at me. I ended up running away through the pathway in tears in anger at him and myself for…	Worhtlessness	Anger	Shame	Fear	None	tired of life being this way	1	4	18				1		1
1								I invested heavily on a whim on a stock that I had no clue of whether or not it would come out successful. It went down the day after I bought it. Then, something inside said do not sell. So I kept it. It went up, then down, up then down. As time went by, I had made more money on that risky decision than I would from my salary. This is a true testament to risk tolerance. If I was scared of loss, …	relief	happy	joyous	hopeful	thrilled	excited	1	1	28	1	1
	1							When I was 17 years old, my boyfriend gave me crabs. I had a terrible "smell" and itched a lot. When I went to the doctor, they told me that I had an STD and craps. I was so upset. Between him giving me a disease and the realization that he cheated on me, I felt humilated. It was so embarressing and I ended up breaking up with him. Before I did, I punched him in the face and kicked him very hard.…	Rage	hate	fear	sad	pain	beside myself	2	4	33				1	1
						1		I had just moved to a new city just as the ecnomony was starting to crash. I didn't really have a job lined up and was worried about getting a job. I had applied to quite a few places and wasn't hearing back about anything. The city I moved to had a hih unemployment rate as a lot of educated people had moved there and were competing. I eventually got an interview but heard nothing more about it. …	worry	concern	none	none	none	concerned	2	1	30							1
							1	I remember a time when I was in first grade. I can recall this event vividly. My class and I went to a koi farm, and the owner showed us the food she fed to the fish. She pulled out a handful of worms. I noticed that one had dropped, but I did not know where it went. I felt something cold crawling across my neck, and heard the shrieks of my classmates. I pretended to stay calm, but my skin was cr…	disgusted	hate	dislike	repulsion	none	repulsed	2	3	28					1
							1	I was over at a friend's house and their baby threw up all over me and touched it quickly and smeared it into my hair and face before I could pass him to to his mom.	Disgust	Anxious	Revolted	None	None	grossed out	2	1	30					1
							1	I had just brought home my first newborn. She was only a few days old. Visitors were in my home. It was obvious that she needed changed. To this point she had not had a bowel movement. As my husband and I opened her diaper, her first bowel movement was coming out. It was so dark and sticky and foul, I was retching and stated, "I can't do this." To which my husband became very worried about the fu…	disgust	inability	shock	hopelessness	none	sickened	2	1	33					1
		1						I was so happy to have completed boot camp. Joining the US Marine Corps was not very wise. I was not physically or mentally ready. I only joined because I wanted to get away from home. Since I did not like studying, college was out of the question. I didn't even take my SAT's. I was afraid of getting an embarrassing score. I originally tested for the Army, but decided on the Marine Corps because …	Proud	strong	excited	attractive	smart	tired of being yelled at all the time	1	1	42		1
				1				I'm thinking about the day my mother died. I was at her bedside. her body had shrunk down to a seemingly impossible size do to cancer. Watching your mother die is a feeling of strange unreality. There is sadness, yes, but also a kind of numbness, and also the sense that, "well, this is just the way it is. There's no getting away from it." And in that sense, there's a strange kind of acceptance yo…	dread	sadness	unreality	bewilderment	energized	trapped	1	1	54
					1			I was going to the post office and at the red light my transmission started to slip and on the way home my timing belt broke and it was the I knew I was screwed as I didnt have any money to fix it , So I sold it for parts on craigslist, I now feel helpless not able to find a job now because I cannot even get there,,	screwed	unlucky	sad	bewilderd	lost	screwed	1	1	44
			1					The last time I really felt like that was more of an emotional experience or emotional "harm". It was when my roomate and I had been fighting for weeks. We fought about everything but we had had a huge argument. She said she thought me & my friends kept her up all night, so the next day she threatened to be really loud & keep me up all night, because she knew I had to get up early the next mornin…	Anger	Upset	Irritated	Frustrated	Sad	Done with you	2	1	24
1								I remember when I was 12 and I hadn't seen my father in a long time because my parents had divorced, he told me he was going to visit me for my birthday. I was very excited leading up to my birthday because I knew I would finally get to spend time with him, like we used to. When the day finally came my dad took me to the movies and then we went shopping so that I could pick out a birthday gift. T…	Excited	Happy	Nervous	Anticipatory	none	Happy	1	6	23			1
			1					i was living by myself at the time and i woke up in the middle of the night. i heard a creaking noise and it seemed to be getting a little louder. sounded like someone walking quietly on the old wooden floorboards. i just stayed in bed and didnt turn on the lights, listening intently. i wish i had kept the handgun my father had given me for protection, but i traded it for a shotgun that was put a…	fear	alarm	none	none	none	scared		1	60						1
		1						When my nephew born.I feel awesome.I fell very happy and I dance and So many time I said thanks to God.when I took him in my arm I feel that this is the perfect situation for my happiness.I kissed him so many time and obviously Tears of happiness was in my eyes.After sometime I called some relatives too who were waiting for the moment.	awesome	Happiness	Exiting	crazy	cheer	Exited	2	3	27		1	1
		1						i was walking, feeling kind of down, i had no money and needed some badly, for groceries among other things, and as i turned a corner i spotted a $20 bill. that was fucking terrific, i thought. moreover, in my walk i headed up the hill near my house, something i often do on walks, and that hill has my grocery store at the top of it. so, long story short, i was able to buy groceries with the money…	joy	ecstasy	thrill	epiphany	upsurge	fucking happy	1	1	53		1
						1		I had to fire an employee of mine. The employee was a friend and a relative of my wife. The guy's performance at work was medicre at best. I caught him stealing supplies from the company, and not just office supplies, computer equipment and so on. I chose to not report the thefts, but remove him from staff instead. the company was able to make up for the loss. He eventually paid back the cost of …	disappointment	anger	frustration	confusion	embarassment	pissed	1	1	26				1			1
					1			I betrayed a friend and wasn't honest to her. We were very close and we looked out for each other and I took advantage of her. I felt very ashamed of myself and very guilty and couldn't believe what I had done. My mind was messed up and I didn't see how life was worth it anymore. I couldn't understand how I could be so terrible to someone who I had looked out for and someone who loved me life a v…	guilt	disappointment	hatred	sadness	inadequacy	f--king stupid	1	3	38			1					1
						1		At this stage of my 32 year marriage i do not cherish the time when if it is first my husband dies. We have been together for a long time and this is such a different world from when I wasn't a Mrs. What I fear is the fact that I will be alone and will I be able to adjust or fade away like many of my friends.	fear	love	lonely	acceptance	fading away	not looking forward to the time	2	1	63							1
		1						I was a teenager and needed a car. On the way to work ( I used my mom's car) I saw the cutest orange sporty car and I knew that I wanted it. I saw it almost every day. Finally, I stopped with my dad and drove it. It seemed to be perfect. My dad wanted me to try another car, so we found a Super beetle and I drove it was nothing like the Kharman Ghia .That little orange car was perfect. Then I got …	excited	happy	proud	cool	independent	excited	2	1	47		1
1								When I was dating my boyfriend for about a year and Valentine's Day was around the corner I thought he might ask to marry me on that special day. I remember feeling butterflies in my stomach all day, wondering what to wear, even what perfume to wear. I was very excited. I felt as if a new chapter could be about to open in my life. I felt like I had finally reached adulthood and that my life lay c…	excitement	anticipation	nervousness			excitied	2	1	58	1
							1	This event happened last week at my home. We live in the country around farms, and the farmers next to us were spreading fertilizer, or manure on the fields. The smell was so awful, I had to close all of the windows in the house, even though it was a nice day outside. I had clothes hanging on the clothesline and was afraid they would be smelly & have to be re-washed too. Even with the windows and…	disgust	irritation	annoyance	frustration	none	irritated	2	1	28					1
	1							I was driving straight when another vehicle pulled across traffic and hit my passenger side rear panel damaging my car and making me late for an appointment which was bad enough however on top of that they did not have any insurance which cost me money out of my own pocket to fix my vehicle I was very upset about it and I didn't really have the money at the time to spare for such an incident whic…	frustration	Inconvenience	anger	disappointment	none	frustrated	1	1	27				1
						1		I remember a time where I came home from school and heard lots of yelling from the kitchen. It was my parents yelling at each other. I felt like this was going to result into something horrible happening in the near future, and I had hoped that nothing would happen. Later that night, the horrible event did happen, and my father had injured my mother with glass. I had felt terrified and scared at …	Scared	Angry	Confused	Upset	none	Scared	1	3	21				1		1	1
					1			About 2 years ago my dog Katie died suddenly. I had purchased this dog 12 years earlier and it was my first dog. Me and my husband got her when we were first married and she was like one of our kids. We were emotionally attached to her and the feeling of her loss was terrible. I screamed in grief. She was extremely smart and lovable and our kids were crazy about her. When she died a member of our…	Grief	Fear	Loneliness	Anxiety	Distress	Sad and grief stricken	2	1	42					1			1
1								I was so excited, and anticipating approval for my very own first apartment. When I got the call that I was approved, I jumped up and down and was soooo excited. The lady on the phone laughed. She also said, "just so you know, your boss had a lot of good things to say about you". My day was made	ecstatic	happy	joyful	proud	accomplished	siked	2	2	45		1
		1						One time the emotional experience I had was when I was promoted to assistant manager of my firm. It was a very happy time for me, as I wasn't expecting this promotion and my boss hadn't let on I was up for it. His boss also hadn't told me about the possible promotion. I was given a very nice raise in salary and greater benefits as part of the package. It was a huge help for my family, as one of u…	happiness	joy	relief	surprise	ease	happy	2	1	48		1
	1							I was 15 years old when I met and began to date my first boyfriend. I was young and thought I was very much in love with this boy. I threw all of myself in to the relationship and created extremely powerful feelings for him but after about 6-7 months he told me that he was going to study to be a pilot and left me. He then started dating my best friend. I hated them both. They lied to me over and …	Sadness	Hate	Rejection	Frustration	Stressful	tired of being lied to	2	1	21				1				1
							1	When I was moving to my new house, I cleaned out the fridge on the day before I officially moved out. There was a container in the back of the fridge that had hamburger in it that had been there for quite a while. I knew that the meat would smell horrible, so I just decided to throw away the whole container. As I threw it in the trash, the lid popper off, and the horrid smell filled the kitchen. …	Disgust	Horror	Repulsed	Revolt	None	Grossed-out	2	1	20					1
	1							I just started college back full time, and my advisor told me that I would be able to retake my math placement test, as my score was not what i knew i was capable of. I studied for the test, and contacted her to see how to take it again. She sent me to the math department, who told me that i am unable to retake it. If i had known this, I would have taken an extra class in the summer to make up fo…	furious	Angry	Dissapointed	Confused		fucking pissed	1	1	22				1
						1		I was nominated for a work bonus. So were a few of my peers. We were nominated for the exact same project, but my boss said they only had enough funds for a few bonuses, not for everyone on the project. I knew in my gut she was preparing me that I did not get the bonus. Which I didn't. It made me feel sick and anxious, angry. We ALL did the same work. It was unfair and I was angry about it for a …	Angry	Devalued	jealous	sick	embarrassed	mad	2	1	53				1			1
1								I was so excited when I thought we were going to get our first french mastiff puppy. I had butterflies in my stomach when I told the kids and they couldn't wait either. We thought about it non stop, sometimes I couldn't sleep for the month we knew but didn't have her yet. When we shopped I bought puppy toys and snacks in anticipation. We sang puppy songs and thought of names until they day she ca…	excitement	Joy	Nervousness	Happiness	Love	nervous and excited about getting this puppy!	2	1	32	1
					1			I remember seeing my grandma in the hospital bed, hooked up to all the instruments, as she laid in her half-wakened stroke state. Then, as the nurse attempted to suck the phlgem out of her throat, her one able side lurched violently in opposition. I clasped onto her hand as I tried to calm her down. Eventually, she resisted, given her weakened state, and then closed her eyes. It was then when my …	sadness	Regret	Despair	Grief	Solemness	powerless to do anything to help her.	2	3	39								1
					1			my dad committed suicide about 3 years ago. that was the day i really fell apart mentally and physically. i tore my whole family up. but, at the same time it make us much stronger. there not a day that goes by that i dont think about him.	sadness	emptiness	lost	broken	torn apart	torn apart	1	1	42				1				1
				1				Meeting a guy at the race track and it was love at first site. I felt a happiness I can't explain, and a strong attraction to this person. It was almost as if this person instantly became a main focus in my life. I felt that I just had to have him. I have never felt so strongly about pursuing a person before. We shared a kiss and I swear time stopped. He took my breath away and everything in my l…	happiness	overwhelmed	loved	nervous	complete	happy	2	1	21			1
	1							An emotional experience was when my friend scared me with a Halloween mask. I am absolutely terrified of masks so I was not expecting it when all of a sudden I was started with it. I was emotionally disturbed and scared from it. After a few minutes I calmed down a little, but unil today I still hate masks and costumes. I don't like how masks have a weird fake look to hem .	scared	terrified	nervous	tense	upset	scared	2	1	20
						1		I remember a time when I expected something negative to happen. This time was when my best friend began to date a girl that I cared very deeply about. I remember thinking that I have lost her. I had and she is now gone and we are not friends anymore, it stinks but it has to happen as it was her decision. This situation sucked I had worked so hard for her to even be friends with me and she left in…	Angry	Pissed	Upset	Abandoned	Forgotten	screwed up	1	1	18			1	1			1	1
	1							My girlfriend at the time, Jacki, didn't understand my mental illness (Borderline Personality Disorder), and how I couldn't sleep. She forced me to go to a theme park with her and a bunch of our friends, and I was absolutely distraught the entire time. I passed out at least twice in the heat, and I was the one that had to drive us back. I decided I wanted to leave and take the hour drive back hom…	Guilt	Sadness	Anger	Hatred	exhaustion	pissed	1	1	21				1			1	1
1								When I was waiting to hear if I had gotten the job. My husband was laid off and we didn't know what was going to happen. When I got the call we were both so happy, now we could pay our bill and buy groceries.If that had not happened we would have had to sel our house, no money for anything. We were so worried. we had just adopted a child a few month before. things looked so much better now.	Ecstatic	worry	happy	sad	joy	happy	2	1	49		1
	1							Out of the blue, my husband told me that he was seeing another woman and that he wanted a divorce. I was in shock and couldn't believe it. He moved out and I fell into such a deep depression that I just laid on my couch and cried. I didn't pay any attention to my children ages 11 and 9. I barely got myself to my part time job. Then he wanted to come back and I let him and was feeling a little bit…	sadness	anger	fear	hate		sad	2	1	65				1				1
			1					I was in the car with my grandmother and we were discussing the baseball game that had just concluded before we left the house. We were heading to the store to buy some lunch meat because we hadn't eaten that day and decided to eat sandwhices for dinner. While we were driving we took a left at a light and I remember hearing this load noise, which I didn't recognize at the time, that turned out to…	PANIC	Fear	Confusion	Reflection	Anger	glad I made it out of that alright	1	1	19					1	1
						1		About three months before the emotional experience, I had taken the bar exam in order to become a practicing attorney in the state in which I reside. That day, the results of the exam were to be posted for all to see. This put me in the most anxious and devastatingly negative mood that I had undergone in the longest of times. I paced around wondering what my life's future would be until the momen…	anxiety	frustration	sadness	fear	disappointment	I am so anxious, it is ridiculous!	1	1	26							1
	1							I was in a program when I was younger. One of the people we worked for was a hypocrite and a jerk. One day he yelled at me and another person in the program for absolutely no reason. I told him that he needed to apologize to the other guy because he had done nothing wrong. I got in big trouble for telling him to apologize. It eventually had me leave the program. I was so mad at this guy because h…	Anger	Disgust	Frustration	anxiety	disbelief	pissed	1	1	30				1				1
			1					I was in a dark hallway on my way to my car when a man came out of the shadows and put a knife to my throat. At that very moment I thought I was going to die. I thought he wanted my wallet and car keys. I thought about the people I loved; my mother, dad, sisters, brother, girlfriend. At that moment in time I felt a deep sense of loss as though I had failed them in some way. Essentially I felt lik…	regret	sad	unhappy	remorse	forbodden	sad	1	1	32				1		1
1								I had been talking with a woman a week and was going to meet her after work. I'd been on some dates but had not met someone i felt very comfortable with in over 10 years. This seemed like it might be different. I got off work and went home to change. I was so excited about meeting someone I would be compatible with, and felt the excitement building as I walked up to the coffee shop. I saw her and…	Lust	Excitement	Anxiety	Happiness	Security					1		1
					1			A couple of years ago, I lost my dog. It was the worst possible way for him to die. I still feel very sad about how this happened. It was hot and he would not eat. I thought it was just the heat. After a few days of water only, I took him to the vet. They said he had multiple organ failure but, he had a chance if I consented to treatment. If I was using my head, I would have put him out of his mi…	heartbreak	anger	sadness	numbness	helplessness	sad I cannot stop crying	2	1	51								1
			1					One year, we actually had bad tornadoes come through our town. It got real dark. I was at home with my children and my husband. My husband told us to get into the pantry because he saw on the radar where a tornado was coming our way. We huddled into the pantry and we could hear a high wind and it got real dark. Then, we actually saw the tornado pick up and go over our house and then come back dow…	Scared	Afraid	Frightened	Unsure	Unknowing	scared	2	1	39		1				1
				1				I had met a woman that was helping keep a fire station open. I was very attracted to her and I thing her to me. I was at her house and we were done with are conversation and she lead me to the door. We talked and I had a strange feeling that we were very attracted to each other. I had never felt this way about anyone. I leaned in to kiss her and she to me. When our lips touched, it was like elect…	excitment	happiness	love	excitment	crazy	emotionally attached to you	1	1	53			1
					1			When I was 12 my grandfather died. It was the first time I had ever felt such intense emotion. Before then everything in my life was a permanent fixture, things that were there and always had been. For some reason I felt that they always would be as well. This was when I realized that human beings are fundamentally alone and that my existence is in no way tied to anyone elses. I realized that I w…	loss	existentialism	crisis	epiphany	realization	lost right now.	1	1	18								1
1								We had been looking for a home in a rural area and finally found one that was somewhat affordable. The prices was a littl ehigh so we put in an offer. The offer was accepted and we needed to obtain a mortgage. It took a long time to fill out the forms and send in all the paperwork and it was a long wait until we got the answer. Our future depended on this, or so we thought at the time. This was a…	excitement	happiness	worry	anxiety	anticipation	stressed	2	1	50	1						1
				1				I love my younger sister. She has been trying to find the right boy for herself. She is just finishing up college now and starting grad school. She had found a boyfriend that she was getting serious with, and the whole family was getting excited because this was the first boyfriend she's had that's gotten along very well with everyone. / / He recently proposed to her and she said, we were all ext…	Happiness	Warmth	Pride	Joy	Contentment	pleased	1	1	28		1	1
				1				This emotional experience was during the first valentine's day with my boyfriend. I did not expect him to get me anything. I remember coming back to my room and finding a bag filled with chocolate on my chair. I became so surprised and loved. Although I didn't get any flowers or anything special, i felt loved because he thought about me and how much I liked chocolate. The card was also very touch…	loved	appreciation	happiness	excited	surprised	happy	2	3	18			1
					1			The death of my grandfather, I was young at the time and he was a good man stern but fair. I really hadn't know loss at that point but I knew that when he passed he was gone forever. I had al ot of questions and grief about it. He deserved more time to be honest. The funeral service was nice and everyone spoke about what a good man he was and thel ife he lead. We should want to be remembered but …	greif	loss	pain	sadness	sorrow	sad	1	1	32				1				1
					1			This is about the time my grandmother died. She had multi-infarction dementia and was suddenly going down rapidly. At the time, we didn't know what was going on--her symptoms were so much like Alzheimer's, but a little different. There was nowhere to turn for comfort. I took care of her for one week during the summer, when my first child was 6 months old. I was driven crazy, trying to satisfy the…	grief	anger	sadness	frustration	regret	upset and disturbed. I don't like remembering this again.	2		58								1
							1	The event I remember happened to me about 10 years ago. I worked at a fish hatchery. I remember walking by a pond where we raised fish and thought that it stunk. I looked into the pond to see if there was a dead fish. I did not see one. The next day, the pond stunk even more. Still, I could not find a dead fish. The day after that, it stunk even more. By now, my boss noticed the smell. He knew it…	Disgust	Gross	Disbelief	Fear	none	grossed out	1	1	31					1
			1					Once when I was driving to work on icy, snowy roads, I almost had a wreck. The snow had not been plowed so you couldnt see where the side of the road was...I guess my right tire got off the side of the road and when I steered it left (not even knowing I was off the road), the car went out of control and slid sideways, eventually stopping 1/2 on and 1/2 off the road, horizontal to oncoming traffic…	fear	powerless	scared	worried	none	nervous	2	1	48						1
	1							As manager I was asked to hire a person from the production floor so the company wouldn not have to fire her--I did but she did not want to conform to the dress code that my other employess did--I asked her several time to conforms but no each time-I went to personnel to have her disaplined and was told to forget it --via the president and ower of the company--I could not do a thing and my other …	discussed	discussed	used	unfairness	company BS	pissed at the situation I could scream.	1	1	70				1			1
	1							A very close friend disclosed a something that I had told her in confidence to a group of people when they were out one night. Even though she told them not to tell me, one of the people did anyway -- saying that I should know. I was so incredibly hurt and angry with this friend I couldn't bring myself to pick up the phone the next few times we called. By the time we finally talked I had worked u…	anger	hurt	enaged	betrayed	none	angry	2	1	38				1
							1	My friend and I were out at night one night with her dog goofing around. And we noticed it sounded like her dog was chewing on something crunch. That being not a good thing most likely, my friend took the thing away from her. Her dog was chewing on a dead squirrel carcass. It was so gross! I screamed, and I wasn't even the one holding it. It still makes my skin crawl and my stomach hurt to think …	disgust	shock	horror	nausea	contamination	grossed out	2	1	30					1
							1	I recently went into my bedroom and kept catching a whiff of something unpleasant. I had just showered so I did not think that the smell was coming from me. I smelled my hands, my clothing, and the bottom of my shoes. None of these things had the offending odor. I looked around the bedroom and noticed a small brown dot on the carpet. I picked it up and smelled it, and that was what it was. Someon…	disgusted	inquisitive	repulsed	annoyed	none	grossed out	2	1	23					1
	1							my friend threw this ball at my sister. it hurt her so bad. i got really mad and he told my mom i did it. i got blamed forsomthing i didnt evendo	jared	fight	tense	rage	anger	pissed	1	1	28				1
	1							I was working at a fast food place and someone stole some cash from one of the cash registers that I happen to be working on. I didn't take any money and was not even worrried as I know I didn't take it. but the real person who did, said that I did and becasue it was my resgister I got the blame and was fired. Noone beleived me, and i felt so hurtful that someone would really lie to cause someone…	hurt	mad	angry	upset	irrated	fucking mad	2	1	42				1				1
						1		Back when I was a young teen, 13 or maybe 14 I got caught shoplifting. The store employees called my parents, and I knew when they would arrive at the store to pick me up I was going to be in trouble. Fear crossed my mind the whole time, the part that was the worst was not knowing what they would do upon arrival. Would they be mad? Disappointed? I just couldn't grasp what was going to happen. I w…	fear	anxiety	fear	discomfort	uneasyness	forgive my choice of word here but, fucked	1	1	23						1	1
1								My husband put in a request for his next duty station to be Hawaii. I eagerly antcipated that we would be able to get Hawaii because when he applied there were a few spots that were open. There was a slight chance we wouldn't get it but it looked extremely likely that we would be able to go there for our next duty station. I remember feeling so excited because it would be a dream come true to liv…	excited	happiness	anticipation	thrilled	none	excited	2		33	1
							1	the other day i was riding my bike, and had to pass by a dead squirel in the street. It was dark, so i didn't see it until i almost ran over it. there were so many flies and little bugs around it that it was really loud. I gagged as I rode by and let out a scream. I am terrified by dead things.	disgust	sick	sad	none	none	grossed out	2	1	23					1
			1					About 11 years ago I had scare, horrible car accident. Oncoming car into my lane so I had to avoid to that car. So I had to hit concrete barricade at high speed. I couldn't move then ambulance came up then they moved me to the emergency room. I had stitches around chin area after treatment. Fortunately I didn't break any bones but I couldn't drive around that area.	horrible	scary	painful	traumatic	none	freak out	1	3	41						1
							1	I remember being at a local department store andsaw a woman with a couple of little kids running around the women who did not seem to care that the children were even beside her. The kids were dirty and unkempt as well as aggravated because they could not get their mother's attention. One of the children, a little bit about 5 years old had a runny nose and was flicking it with his tongue. My stom…	disgust	anger	sadness	worry	guilt	disgusted	2	1	44				1	1
					1			A time when I lost something important to be was when I was in 7th grade. I had a cat for about 3 years named Rocky. He was a mixed Himalayan rescue that I absolutely adored. I had so much memories with him. But from the moment we got the cat, my mom started to experience allergies. She suffered through 3 years of it until she couldn't handle it anymore. So 3 years after we rescued Rocky, my mom …	devasted	lost	sad	empty	mad	sad	2	3	28				1				1
	1							I was an assistant mgr. I went out on a limb to bring a grievance forward for a friend at another store. When the event was investigated the friend stated that she did not know of the situation and denied that it even happened as a result I was disciplined and my relationship with my employers was permanately damaged and eventually cost me my job. I felt totally betrayed. My friend continued to w…	betrayed	hurt	lost	alone	angry	anrgy that you asked me to help you and then denied that anything even happened.	2	1	52				1				1
			1					When I was a kid my family went camping with my cousin's family in Mt. Whitney, California. One day me, my brother and my cousin decided to go hiking in the woods. We had been walking for about an hour when we suddenly came upon a bear near a stream. My cousin and brother yelled "bear!" and it looked at us. We ran as fast as we could back to the camp site. I was scared the whole time because I di…	fear	excitement	shock	surprise	none	scared	1	1	29						1
							1	During one car ride to home, I was driving, the windows were down, and my music was blasting as I slightly speeding. For what seemed like just a regular ten minutes of driving to home, it was the last 2 minutes that were hell. As soon as I passed a specific point on the road, I smelled something extremely repulsive. It was the stench of a dead skunk and the fumes were spreading like wildfire. For…	Putrid	Agony	Frustration	Anxiety	Hopelessness	disgusted	1	3	21					1
					1			When I was a child, I always had my stuffed animal frog with me. My brother gave it to me and I loved it so much. One day I came in my bedroom and found that our dog had ripped it to shreds. The stuffed animal frog had been with me through a surgery and bad times in my life. I was so sad I dropped everything and cried for hours. It still affects me to this day because the frog had so much emotion…	Sadness	Anger	Despair	Irritation	Fear	pissed	2	1	29
			1					A time where I felt that my life was in danger was during an especially heated argument I had with someone. I was tired of this individual's carelessness of the situation and got to a point where I berated that person because I didn't care anymore. There was nothing I could say to convince him. He ran after me and tackled me to the floor and my head bounced off of the floor. If it wasn't for peop…	hatred	alone	betrayed	frustrated	irritated	angry	1	3	30				1		1
			1					Once I was driving down the road at about 35 m.p.h. I started to hear a knocking noise from the front drivers side tire well. The noise went away as I came to stop at a light but started again as I drove. When I went to make a right hand turn, the front drivers side tire flew off, bouncing over an on coming car, and settled in a wash. I managed to get the car off the road, but it was one of the m…	fear	shock	panic	relief	greatful	scared	2	1	30						1
				1				I was extremely close to my son when he was younger. He would always want to come to me but I thought that drugs were more important and pushed him away. I wanted to go get high instead of taking care of him. I feel like a horrible mother and I still feel the pain in my heart when I think about it.	hurt	pain	sorrow	regret	horrible	blessed	2	1	26
		1						I had an old pair of leather shoes that were in great shape. I didn't wear them because they are cream colored and ger dirty real fast. So for my birthday my girlfriend decided to dye them for me. The look brand new and I love them. I felt so honored that she took the time to do that for me. I was really surprised and excited to wear them. She really made my day. It was awesome.	Happy	Loved	Honored	Cherished		lucky	1	4	43		1
					1			I felt a lot of anxiety reading this passage. I was unsure about the events and they made me unhappy	anxious	sadness	depressed	angry	mad	sad	2	2	23				1				1
					1			The phone rang.My mother picks up,and I see her face crumble down.Her hand raise to her forehead.Her brother,my uncle,was murdered.Found dead strewn across an ol log like a scare crow.Blood found all over the hood of the car.I felt my soul sink to my stomach.Hatred swelled up and deep sadness.	Dumbfounded	Hatred	Confusion	Helpless	Depressed	Angry	2	1	33			1					1
					1			What comes to mind is over ten years ago when I lost my grandfather to a brain tumor. I was emotionally devastated and still have not fully recovered. I thought about all the things we used to do together and all the conversations we used to have and time spent together enjoying each others company. I thought about the incredible loss I felt and how I knew my life would never be the same again af…	sadness	extreme sadness	devastation	depression	inconsolable	devastated	2	1	36								1
					1			In the year 1991, I was 3.5 months pregnant with twins when I went into early labor. I went to the hospital and was taken into the ER. My Mom and the rest of family members weren't allowed in. I was left on a gurney when the first little baby was aborted from my body. I lay there until it was cold as I was helpless.	hopelessness	scared	helpless	angry	none	afraid	2	1	41								1
						1		I overdrew my checking account by quite a bit and still had to pay rent. I wasn't getting paid again for another week so I couldn't pay my rent on time and it was already slated to be taken out of my account in 2 days. Aside from the late fees of not paying my rent, I would also get an overdraft fee from my bank and a returned payment charge from my land lord. I had to call my dad to bail me out …	Panic	Fear	Sad	Stressed	none	stressed	2	1	32							1
				1				My most emotion experience was when I meet my finance for the second time. We had meet at a party in 2010 but I didnt see him again until 2012. When I seen him in the grocery store I was so nervous. I new he was interested in dating but I was to nervous to talk to him and he is shy so I new he wouldnt approach me. I decided to just go for it talk to him and see what happens. I was so scared. When…	Anxious	Love	Nervous	Happy	Determined	nervous, but very excited.	2	5	25			1				1
	1							Back in 1998 my mother was diagnosed as terminally ill. For a long time I took care of her and she lived a lot longer than expected.....so in 2003 she tried to carry on with her life as best as she could with someone else instead of dwelling on her illness. My mother had been divorced during this time because my father left her due to her illness. My mother found someone else to share her life wi…	empty	sad	angry	frustration	depression	tired	2	1	36				1				1
					1			I lost my cat cleo I had her for 14 years, she was a big part of my life. Cleo was the first pet I had ever had that was my own. One day she got outside and I waited at the window watching for her. I actualy thought I would see her again so I just waited everyday. I remember that I cried almost every night, my nose bled a few times. It seems silly to be so sad about a cat but she was all I had le…	despare	sadness	despair	mad	hopeless	mad at the world for the loss of my friend and pet	2	1	24				1				1
1								my girlfriend left me about 3 weeks ago, I was overwhelmed with emotion, I was mad at first, then I was upset. I was thinking how could she do it, why, what did I do wrong, what I could have done to prevent it from happening, I had a mix of emotions from anger, sadness, lonliness, I lost my appitite for about a week where I did not eat anything, I was devastated. I thought of how I could do somet…	sadness	sadness	depression	anger	lonliness	depressed	1	1	22
			1					Around 1985 I was working as an part-time taxi driver. I had gone to the office which happened to be located in The Bronx NY to check in. It was pretty early in the morning and I had to climb a pretty good number of steps to reach the desired location. As I was reaching the top of the stairs a large pit bull charged at me. Needless to say I was scared. I was fortunate enough to have been able to …	Scared	Angry	Surprised	Nervous	Unstable	scared	1	2	63						1
	1							I was at work one day, i was a bartender at the time. We were busy , really busy and i had another guy working with me. at the end of the night we were counting up our tips. when we were finished something didn't seem right, there wasn't enough money. it seems to be a lot less than it should be. a few days later i over heard how much he had made that night, it was 3 times what we had split, i was…	anger	hurt	mad	cheated	sad	pissed	1	1	37				1
	1							When my boyfriend and I were breaking up and I was moving out, I had accepted another job in another state. It was a pretty amicable breakup, and he said he would help the mover to get my things packed up while I went to the new state early for training. I was going to be living in an extended stay hotel room until my furniture and stuff arrived by the mover. So I trusted him and went to the city…	anger	furious	disappointed	sorrow	guilt	pissed	2	1	42				1
						1		I LOVE HER SO MUCH JUST THINKING ABOUT HER IS MAKEING ME CRY! She is the sweetest girl in the whole universe! how could anyone not luv her? and I know some do but if you are one of them and you post on here i will report it! SHe Is so sweet and I really really really really reallly want to meet her! My friend met her and I didn't but she is my Idol and my rolemodel! and is like a big sister to me…	LOVE	LOVE	LOVE	LOVE	LOVE	LOVE	1	2	20			1
						1		When I first decided that I wanted to switch my major to nursing, I became immediately worried that I would not get into the nursing program at my school. Then I started thinking, even if I did get in, that I would flunk out of the program because I am not smart enough. For days, I was continually stressed out and cried often about the possibility of these things happening. I'm still worried, but…	Worry	Nervous	anxious	tense	distressed	nervous	2	1	19							1
	1							So at a party i saw a chick i used to hook up with back in the day. She was telling me how she just got engaged to her boyfriend before he was going on a 366 day deployment(a year and a day). So he was busy getting shitfaced with his buddy and me and her kept joking and remnisicing with this other kid who was sort of creepy. So we continue flirting all night while this kid hangs around with us. S…	lust	sexy	wanted	guilty	mischeivious	evil	1	1	23
				1				Because we are so anti-authority in our culture we question the full authority of the bible. We fall into the trap of those that question God's Word without much backlash, because after all would God really say that, or did He really mean that? We have set ourselves up as "the authority" in our life, so we can use His word like a buffet, taking what we like, leaving the rest behind. We choose wha…	awe	intense	scared	aesome	shocked	scared	1	1	20
1								When I was dating my future husband, I was hoping after dating 18 months that he would proposeon our weekend getaway. My anticipation was high. We were both enjoying the weekend immensly. As we were traveling in the mountains, he took me to a remote waterfall where he did ask me to marry him. I was jubilant and so excited that I nearly wet my pants!! LOL. It was an exciting time for both of us as…	jubilant	happy	excited	hopeful	anticipation	excited and happy	2	1	57	1	1	1
1								I was hired onto this company that paid 10 times how much i usually make with unlimited income potential. I remember leaving the interview with my husband and we were both so optimistic that we had already started a list house,car,clothes,t.v etc. I remember the look on my husbands face like I knew you could do it and in that moment I was so happy I could have cried. We went out to eat and called…	Happy	content	determined	proud	inspired	happy	2	1	28		1
		1						My husband and I had a wonderful day yesterday. Our lives seemed complete and I look forward to spending the rest of my life with him. Sometimes I take for granite what we have. I'm excited to see what adventures we will have together and the places we will see and explore. We've been married for 3 years and together for 7, but sometimes like yesterday I just get an overwhelming feeling of love a…	Love	Admiration	Joy	Contentment	Excitement	Satisfied and eager for my life with my husband	2	1	26			1
				1				The first time I met my husband I experienced an instant, emotional connection. We talked for over 12 hours without running out of things to say. We shared our life stories. I had never felt such a connection to someone in my life, and tears were frequent the whole night - both happy and sad. But - I had an overwhelming positive experience that I was finally safe, that nothing I could say to him …	elated	joyous	happy	ecstatic	uplifted	in love!	2	1	36			1
			1					I went on a beach trip with an ex boyfriend. We spent a few days at a beach resort and had a great time. On the way home though, something had changed. The vibe was different and I could tell that he was mad, and even worse, he was mad at ME. I wasn't sure why, and when I asked, I didn't get much of a response. We finally made it home from the beach. I hopped in the shower... he knocked at the do…	fear	confusion	regret	god		scared	2	6	24				1		1
						1		A time when I had a feeling something bad was going to happen was when I got my new car and I got a speeding ticket and then went home and was planning to go out with a friend later and I had a feeling something bad was going to happen and later that night we were driving home and I ended up getting in car wreck and totalled my car. I was very upset about this sad situation. I should have known n…	Sadness	hurt	upset	guilty	stupid	hurt	2	1	52							1	1
						1		I suspected I was going to get a bad review. I got a bad review, even though it wasn't true. My supervisor did not like me and took this opportunity to try and screw me. Unfortunately for him and fortunately for me, he was so incompetant that he couldn.t even pull off his dirty trick. It did not change my feelings toward him: i disliked him before and I still dislike him. Fortunately, he is no lo…	disgust	betrayal	anger	kick in the head	sadness	annoyed	1	1	64				1
			1					when I was a teenager I was raped by a classmate. This person was someone I knew and I was terrified at the time. I was a virgin and he stalked me for several years following the incident. My friends didnt believe me as he told everyone I wanted it and never was able to admit what he did. I have been emotionally scarred and to this day still can smell him. I remember what I was wearing and the ar…	fear	anger	embarrassment	guilt	shame	upset i feel so dirty	2	1	50				1		1
			1					I went over to my mothers house one day. A mutual "friend" said he was going over to my moms anyways so he'd give me a ride. On the way home when he was to be dropping me off, he passed the turn he needed to take and passed right by my road. He went down a few blocks and parked in a parking lot behind a semi (it was also dark outside). It was a -VERY- uncomfortable experience. I was married with …	fear	sad	scared	used	dirty	scared	2	1	30				1		1	1
		1						I can remember finding out that my son was highly ranked in the state at his position, playing football. I was proud to know that all his work he put, the dedication, sacrafices had all began to pay off. To top it off, he is not recruited by some of the top division 1 colleges. I see him, and he reminds me myself now, with his work ethic and hard work. If I had his attitude that he has now, when …	Humbled	Happy	Overjoyed	Estatic	Proud	elated	1	2	37		1	1
				1				I was talking to a guy named David. I remember when I first met him and I was attracted to him. After going out a couple of times i remember going to house and watching a movie. As we watched the movie we were lying down. I remember reaching over and caresing his chest. I remember closing my eyes as he leaned over and gently touched my hair. The feeling was just intense, it felt so good and relax…	Intense	happy	peaceful	comforting	hopeful	happy	1	4	31			1
						1		This is when my mother had to go to India because my grandmother was on the hospital bed, only a matter of days of being dead. My father was being a fucking asshole about it and wouldn't let her go. There was a lot of arguing, and I couldn't stop crying through all of it. I punched my dad in the face and called him heartless, because he truly was. He didn't even care about what would happen, or m…	Sad	distressed	angry	rage	resent	fucking upset and pissed	1	3	19				1				1
1								I was in prison and knew I was going to be getting out soon but had no idea what day. Then 2 days before I got out they told me the day. I was so excited and happy. This was going to take forever to get to this day but I was still extremely happy knowing it was coming. Then the day came and I really didn't know how to feel, I just knew I was nervous, happy, excited, and couldn't wait to get home …	Excitement	happy	nervous	scared	joyful	happy	2	1	50	1
					1			About 9 mnths after moving to a new house, I went to get our christmas decorations for the holisdays and could not find them. After talking with my husand, we realiazed we probably left them at our old house. We contacted the new owners and they confirmed that they found the decorations and ornanments in the attic. They had sold them all at a yard sale and they were lost to us forever. Many of th…	emptiness	regret	sadness	despair	anger	freaking sad and angry.	2	1	46			1					1
						1		We just found out we were pregnant. One week later a doctor told us of a threat of miscarriage. We had another appointment the next day to find out if this had happened. We were terrified of losing our first baby. I was trying to comfort my wife and not let my own fears overwhelm me. We had to spend a whole day no knowing and just waiting for the appointment and an ultrasound. it was awful.	overwhelmed	afraid	terrified	helpless		scared	1	1	34							1
		1						I had a cat die. she happened to be the most loving cat I had ever had	sadness	loss	melancholy	depression	none	sad	2	1	56
1								I was going to ask my girlfriend at the time, Diane, to marry me. I was sitting in my living room with her, and I thought she would say yes, and she did. At first she wasn't quite sure, and she said "are you asking me to marry you?", and I said yes. It was a time when everything was going well for us, we enjoyed each other's company greatly. I felt good about asking her. While there were complica…	euphoria	relief	contentment	overjoyed	commitment	happy	1	1	61	1	1
			1					It was in the 5th grade. This kid in the next grade picked on me. He punch me on the shoulder. He put leaves in my shirt. I cried every day. My parents were not care.	Angry	Sad	Hurt	none	none	Helpless	1	4	23				1			1
			1					I was still in a relationship with my ex shortly after giving birth to our son. My emotions were unstable because I was post partum, and he'd been absent for most of the pregnancy. He was continuing on with the general absence (partying with friends) when I confronted him about the situation. I was aggressive in addressing the issue and he responded with violence. I was scared and hurt. I felt be…	Fear	disappointment	anger	sad	betrayal	scared	2	1	31				1		1
							1	I will be the first to say there is no formula to a time with God. There's no right or wrong way! There's no perfect way...but having someone show you how they do can be extremely helpful! / / For example some think that your quiet time has to be just that, quiet! Well that's not always possible! Some think quiet time has to be a full 30 minutes or it doesn't count! Some even think that there's a…	sad	beauty	emotion	sad	fear	slutty	2	1	22
		1						I was so happy when my bf told me he was going to take me to Europe, particularly in Netherlands. When we arrived there, we also visited Belgium through a tour bus. We met so many people and ate very delicious meals. He also bought me very nice clothes and stayed in 2 nice hotels. I wish I can visit there again.	ecstatic	shocked	surprised	happy	excited	excited	2	3	27		1
			1					I had to ask my parents for some money about a couple weeks ago. I had gotten into a situation where my current job stopped paying me and I was broke. I had to reach out and it was a very humbling stressful experience that I don't wish to have happen ever again. Thankfully my father was very understanding and willing to help, of which I am extremely grateful. We talked for awhile about what I was…	humility	shame	reflief	none	none	relived	1	1	28
							1	Was using a public restroom, while traveling, and my cell phone fell out of my pocket into the toilet. I immediately felt shock, as if it didn't happen. Then I saw it sitting there, in the toilet, and realized there was no way around it. Confusion then hit; I needed the phone, since I was traveling. Did I need to retrieve it, for the insurance. I paced back and forth and thought; anxiety, confusi…	disgust	gross	sick	horror	none	disgusted	1	1	35					1
					1			My servant was the one who took care of me from the time I was born to her last breath. I have been with her and I have loved her very much for dedicating her life to making me who I am now. She died because of a heart attack and my / Parents did not know How whey would tell me. At the end of the day, I buried my servant and never bad another one from then on,	Loss	Loss	Sadness	Loneliness	Bitterness	Sad	2	3	26			1	1				1
		1						When [university] called me to say that I had been accepted to their program, I could hardly function, I was so happy and relieved. It was almost completely unexpected. I didn't think I was going to get in, and if I did get in, I expected a form letter, not a phone call from the head of the department. I was working in a restaurant at the time and had gotten embroiled in a very nasty affair, whic…	grateful	happy	nervous	undeserving	anxious	happy	3	1	32		1
			1					I had to intervene in a heated argument between two high school boys on a bus. One of the boys was about six feet five inches tall and weighed about two hundred and forty pounds. The other boy was about five feet eight inches tall and weighed about one hundred and sixty pounds. I was significantly smaller than both of the boys. I yelled at the boys and separated them and put myself in the seat wi…	Anxiety	Fear	Restlessness	Worry	Joy	frustrated in trying how to figure out what is the best way to control this situation!	2	1	51				1		1
			1					I was hiking with my group around a lake in a very isolated part of Alaska. When I looked at the way around the lake from our entry point, I saw a difficult but doable hike, with the promise of lunch at the end. When I got through the scrub and rock, though, I realized I would have to descend a steep, slick looking glacier to reach the path around the shore of the lake. As I stepped out onto the …	fear	anger	disappointment	sadness	uncertainty	scared	2	1	20						1
				1				I was with my wife and kids at the festival enjoying the fact that my 3 year old was going on the rides when it started to pour outside. Everyone ran indoors when it started including us but we enjoyed skipping through the fast growing puddles. When we finally hoped up inside a starbucks we got some coffee and hot chocolate and tried to dry ourselves off. It was useless and we laughed. We had to …	adventurous	funny	fun	crazy	cold	soaked	1	1	26		1	1
					1			When I was 21 I met a fantastic girl. We dated for four years and our relationship was very strong and happy for most of that time. After about four years, our love and enthusiasm for each other began to dwindle. Around this time I began to suspect that she was cheating on me, or else strongly considering cheating on me. I was heartbroken because I knew it was over. I knew she wouldn't initiate a…	pain	sadness	despair	loss	depression	hurt	1	5	30
				1				I love going to bed at night with my husband. We talk, we snuggle, we make love. It is my favorite time of the day because it is just the two of us and we are so close. Whatever has happened that day that is bad disappears when we crawl into bed together. If it is cold, we hug each other. If it is warm, we lay naked on top of the blankets. It is the time we look forward to each day. Last night wa…	love	closeness	friends	passion	forever	happy	2	1	48			1
		1						I witnessed the birth of my son. At first, it was terrifying because his head popped out of the incision just like the monster in the scene in the original Alien movie. He was covered in goo, slime, and blood just like the monster. But, after the nurse cleaned the little bastard off and convinced me it was safe to hold him, I was amazed. It was a little version of me!	Proud	shock	awe	pride	love	happy	1	1	47			1
						1		husband went to vegas for bachelor party and i was convinced he was going to do something horrible (cheat on me with some hooker). i have no idea why i would think such a thing - he's the most honest and trustworthy person i know. maybe because it was vegas? i'm not really sure. well, i told him, half jokingly, not to sleep with any hookers, and he got super mad at me! i guess i'll never really k…	sadness	devastation	hopelessness	anger	desolation	upset, but really for no reason! i'm just acting crazy.	2	1	33							1
				1				An intensely emotional event in my life was when I was chosen to be the partner to receive the most precious of gifts. I was the innocence of the first romantic and sexual encounter. While this is not something one flaunts, it was intensely personal because this person chose me to share it with. The feelings I had initially were very deep and emotional to the point I started to cry. This touched …	LOVE	sharing	companionship	touching	intimate	excited to be chosen for this once in a lifetime moment. For him to chose me to lose his virginity!	2	1	47			1
		1						I won a scratch off lottery last year for $1,000! I was so releived and excited. I was able to use the money to pay some bills and have a great night out on the town with my family. I felt a strong sense of happiness and relief. For the first time in a long time, I did not have to worry about blowing the family budget. We had a great time.	happy	Excited	joyful	relaxed	thankful	luck	1	1	30		1
1								We were married and were struggling to finish our last year of college. We had small student loans and i worked to pay for our living expenses. We had expensive medical needs and the money wasn't going to last very long. I knew my husband was working hard and heard chatter of him getting a bonus ir a promotion. I was so hoping it would come soon enough to cover our costs, but i was too scared to …	Anxiety	Hope	Fear			Concerned	2	1	28	1						1
						1		I remeber when I lost my job because of a layoff. It was a very emotinal experience for me. I felt sad and kind of depressed. I was worring that I might not be able to find another job. The caused me not to want to eat for some time and I felt really bad and did not want ot go out and party either. I did not want to think unpleasent thought but it is kind of hard to feel good as this situation is…	sadness	joylessness	depressed	blue	none	very sad	1	1	47								1
				1				It was the first time I came to the islands with my girlfriend. The flight in you can survey the entire land and you start to feel excited about something you've never done before. I would not have visited this place if it were not for my girlfriend. To be able to go to the beach every day and have the most relaxing time is what I most remember. I didn't have to care about any other obligations a…	relaxed	excited	released	happy	content	happy about coming here.	1	1	31		1
							1	I remember feeling something running along my arm and it turned out to be a roach. I immediately jumped up and gave a brief yell. I then immediately smashed the roach with a book that was on the table. I was absolutely grossed out by the thought of it touching my arm as I sat on the couch even if it was only for a few seconds. I was both startled and disgusted but was able to forget about it soon…	startled	surprised	shocked	sickened	disgusted	grossed out	1	1	31					1
1								I felt so alive. So full of energy. I couldn't think of anything aside from the positivity. I knew that the best possible outcome would come from this. It just had to work out for me. There was nothing that could go wrong with this, it was perfect. It was planned out completely. It was just absolutely perfect. I had never been so prepared and so happy for something in my entire life. I felt truly…	happiness	positivity	pride	none	none	happy!	2	1	20		1
					1			the memory is too emotional to write about in a 25 cent survey.. are you kidding me????	hurt	sadness	hopelessness	pain	anger	lost	1	1	31								1
		1						the day my daughters were born...happiness wonder fear... my husbands face as one than another were born. The joy of doing it naturally after all, the wonder of having two. the nurses being nice. But one was different...tired I think. the idea we had no names yet...and no real idea. having our families there was wonderful....in this day and it was great. The thoughts that there would be no more..…	love	happiness	nervous	proud	scared	blessed	2	1	55		1	1
		1						In this event, I was waiting to receive an email from a job I applied for. I was told I passed the phone-interview stage of the interview. I remember checking my email awaiting to see if I was going to move onward to the final, in-person interview. The job was actually a promotion for where I was doing my internship at the time. While I was at work, I checked my email and saw that my boss sent me…	relief	excited	nervous	happy	ecstatic	freaking excited	2	6	22	1
			1					i was being threatened by my husband. i had removed the children from the home before my husband came in from the / / BAR. i knew he would be drunk and he started an argument which escalated and then he began to take his belt off and it had a big / / buckle on it and he bean to swing it at me. i grabbed my purse and keys, ran to the car to get away from him and that was the beginning of our divor…	fear	scared	mad	hurt	helpless	hurt and feel like such a failure because the marriage didn't last.	2	1	71				1		1
1								When my boyfriend and I got together I thought that he would be the end to all of my broken roads and misguided past relationships. I thought that we would marry quickly and be so happy. I was for the first time in a very long time extremely happy and optimistic about the outcome. He wanted to marry me and expressed with I was his princess and he wanted to give the the very best and make my frien…	love	happiness	excitement	anxious	clarity	lucky	2	1	25	1		1
						1		I remember being late with the rent and worrying about seeing the landlord. I left him a note to approach the situation openly but I was not sure how he would react. I thought about trying to avoid him while I still didn't have the rent money. Within a couple of weeks, I paid the rent, but I was scared the whole time about seeing him and feeling ashamed or awkward.	shame	fear	frustration	nervousness	anxiety	freaked out	2	1	47							1
				1				I was stranded in a weird bar with my drunk friends and they refused to pick me up. I tried really hard to convince but they were wrong. I felt really scared and nervous that I wouldn't get home. I called my boyfriend at the time and beg him to leave the get together he was at to pick me up. He couldn't at first because he didn't have a car and he's friend was driving but he finally convinced his…	Safe	Calm	Nervous	Loved	Hopeless	scared	2	2	20			1			1	1
		1						It was the day I gave birth to my first son. It was early. I was anxious and pretty much a ball of nerves. I didn't know what to expect. My husband and my mother were there with me to help get me through. We got to the hospital to be induced around 5 AM and I really was ready to start the pushing but it didn't go like that. I had some back labor which caused me to ask for the drugs...lol. It was …	love	anxious	proud	happy	elated	blessed	2	1	25		1	1
						1		Basically I had a $40,000 scholarship and I needed a 3.0 GPA to keep the scholarship. So I had to take 1 more class to get a 3.0 in and when it came time to the final I was pretty sure I was going to fail and it lose my scholarship. However, I got an A on it and got my scholarship back.	Relief	Happiness	Nervous	Worried	Sad	Nervous	1	1	19							1
1								I was in a long distance relationship with Bob. We planned to meet at a convention to attend and to enjoy each others company over the weekend. I so looked forward to that trip. Bob was funny, intelligent and we had great sex together. And the trip pretty much worked out like that. We had a lot of fun, saw a lot of interesting stuff and had a lot of sex. Then he went back to Michigan and I went b…	Nostalgia	lust	pleasure	happy	sad	horny	2	1	58	1		1
	1							My boyfriend of 6 years came home one day and told me that he had been seeing another woman. He explained to me that the woman he had been "friends" with from work was acutally someone who he was dating while I was at work. I remember feeling completely shocked that the person who I've shared my life with for that long would so easily fall for someone else and lie to me about it. I was so upset, …	hurt	betrayed	surprised	sad	disappointed	sad and hurt	2	1	27				1
				1				I befriended an mm and daughter from Israel who came to my local communit for cancer treatment. I had the privilege and bonding with them and helping them during the daughter's treatmen which included radiation , chemotherapy and blod work on a 2-3 imes per week basis. It was a very emotional thing to see how strong the mom and daughter were. their english was not that good so my hebrew served me…	gratitude	admiration	empathy	selflessness	hope	gratefel to be in a position to assist these friends	2	1	55		1	1
						1		The experience I recently had, was with my daughter coming to town to visit. I was hoping everything would go well, but knew that there were some issues she had with me, moving away. I might of not suggested a summer vacation at my house, if I would of know the turn of events that would happen. When she arrived we fought a lot. I was so mad, I sent her packing back to her Dads. I told him to come…	Anger!	depressed	disappointed	annoyed	frustrated	mad!	2	1	33				1
	1							A few years ago I got HPV from a partner even though we were practicing safe sex. I felt that this was unfair because I had been careful, was only sleeping with one person, and used protection. I felt guilty. I thought no one else would ever want to be with me. I felt scared that I might get cancer. I felt confused because I didn't understan how this happened or what I could do about it. I was al…	anger	confusion	shame	fear	anxiety	embarassed	2	1	27						1	1	1
			1					One evening, after work, I watched the news which had a story about a rapist in my neighborhood. I went to sleep after the program and was awakened by a noise outside my bedroom window. I got up in the dark, went to the kitchen and grabbed an ice pick. I stood, frozen, in the middle of my living room, waiting to hear if a window got opened or if someone was inside my home. I picked up the phone a…	FEAR	anger	angst	worry	stupidity	freakin' scared!	2	1	42				1		1
		1						My fiance and I went to NYC to listen to Neil Gaiman, one of my favorite writers, talk about his new book. At the end of the show, we were allowed to have him sign an object. I had him sign a comic that if not for him, I wouldn't have gotten from another person. It was a full-circle moment and it was an incredible feeling to be in front of a man whom I rescued from a belligerent drunk on New Year…	Giddy	Excited	Phyched	Grateful	none	psyched	1	1	35		1
	1							I worked at another company. My boss kept telling me I could do more and a position in another department opened up. She kept pushing me tp apply for the job and made me feel certain I would get it since she knew the hiring manager. I applied and went through the whole interview process. Later the hiring manager called me in the office and told me that I did not recieve the job. That my boss told…	angry	hurt	betrayed	sad	none	angry	2	3	34				1
			1					my boyfriend was high and he was paranoid so he slammed me against a wall and punched me in the face repeatedly until I blacked out. when I woke up I was scared he was still in the house so I hid in the closet until my friend came by to check on me. I have never been more terrified in my life and ive never had someone treat me that way for no reason.	hurt	beat	bruised	scarred	scared	terrified	2	1	25				1		1
	1							The adviser where I was interning disliked me. She saw I was having difficulty with one type of patient and as a result contacted my school. My school sent over a criteria for passing and my adviser said that I was meeting all the requirements. As a result, she came up with her own list that I didn't need to be able to pass according to my school. She failed me, despite me being prepared as indic…	Hatred	Sickened	Angry	Scared	none	angry	2	1	28				1				1
			1					When I was in my high school English class, I was talking to another classmate. We were playing around and aking jokes at each other. He got mad and stood up. I thought we were still playing around so I stood up too. Then he pushed me and I feel into some desks. I thought he was going to try to fight me. He was a really big, muscular guy. The biggest guy in our school, actually. So I was pretty f…	Fear	Confused	none	none	none	scared	1	2	28				1		1
			1					I was at a stop light rushing to go to work, I was late. so at the light, there was many people waiting, and it turned green and I hit the acceraltor hard to across the street. As I did that, something happened and in my mind, instinctively stepped on the brake, as I did that a tractor trailer that went through the red light going about 70 went inches in front of me. If I hadn't of stopped the tr…	terrified	scare	worry	fear	luck	lucky	2	1	27						1
				1				Standing near the airport with my girlfriend. She is leaving on a plane for a very long period of time. Sitting out on the road nearby watching the planes takeoff and land. Its nice, though slightly warm. Just held each other. Hard working keeping emotions in check. She is near tears. We stood there for a very long time, knowing that it was the last time we would see each other for a while. Tried…	sadness	sadness	contentedness	fear	none	down	1	1	27			1					1
					1			In 2008 I lost a grandmother figure to me. I was young but I knew what was going on. I felt bad. My heart felt heavy. I felt powerless. I remember watching her getting buried. This was good bye forever. It made realize how life is so weak and fragile. I had a sense of reality check. I remember being disappointed but soon I reminded my self that life has to be lived and not dread upon. For parts o…	confusion	sorrow	gloomy	broken	tearful	sad	2	3	21				1				1
	1							My wife told me she was pregnant, and then ended up telling me it wasn't mine, that she had been sleeping with someone else. Immediately my thoughts started racing, I can't even begin to describe the amount of negative emotion I felt all at once. It was overwelming, I left but had to pull my car over immediately and call my mother to come and get me. I sat there and cried to her, not knowing what…	anger	sadness	grief	depression	hopelessness	at loss for words.	1	5	27				1				1
							1	My sister lived in an old farm house and found baby foxes on the property, whose mom was gone. She decided to help raise them. / They were kept outside on the cement deck. She fed them for a few days, but they died anyway. She didn't bury them immediately, I happened to look at them, there were maggots crawling all over, It was so disgusting, I can still remember the site / of them, I felt very b…	Disgust	Sadness	Disbelief	Nausea	Pity	reminded of how horrible the sight was	2	1	55					1
					1			Last year when my boyfriend broke up with me in the begining of the year that was the most saddest time for me, he left me without even telling me he wanted to break up. I cried every night to sleep and I was very depressed about what happened I would always blame myself about the break up I thought I did something wrong that caused the whole thing. I never thought we would be together ever again…	Depression	Hurt	Sadness	Depressed	Lost	Hurt	2	2	21			1					1
							1	Yesterday when I was driving toward the highway with my windows down, I suddenly got a very strong whiff of sulfur. It seemed like I was driving by a wastewater treatment plant or a paper factory, and was extremely unpleasant. I hoped I would drive past it soon, and was quite relieved when I passed beyond its reach.	revulsion	disgust	anxiety	none	none	disgusted	2	1	28					1
					1			A little over two years ago my grandmother died. She was my heart. She was 71. She'd been sick on and off for years and knocked on deaths door a couple of times in the past years but this was a shock. I always said to myself that I didn't know how I would survive when she passed. It's been two years now and I am proud of myself for how I've handled it even though I still cry whenever her name is …	Hurt	emptiness	sadness	loss	confusion	hurt	2	2	20			1					1
					1			I had just seen family at a family reunion several days before getting a phone call. My uncle whom I was extremely close to died suddenly and unexpectedly. I started screaming no! into the phone and crying when my sister told me. It was so painful I had trouble breathing and my heart felt like it was stopping. I could not gain control of my emotions and cried endlessly. that night my sleep was ve…	Sadness	helpless	guilty	angry	heartbroken	devastated	2	1	45			1					1
	1							When I was younger my mom would tell me she would take away my phone if I wasn't good. One day we got into a large argument and she took it away. The argument was not my fault. I really wanted it back so I screamed and yelled and got extremely angry, she threatened to break my phone. She ended up breaking it when I got more mad. I then started to have a crying fit. I couldn't stop. It was the wor…	Despair	Sadness	Anger	Disappointment	Hatred	Flustered	2	1	21				1				1
						1		When I was a highschool senior, I was asked to give the welcoming speech at our graduation. I am very shy and don't like being the center of attention. I couldn't refuse the offer not only because my family would have been disappointed, but my friends thought it was great. Writing the speech took me quite awhile because I'm something of a perfectionist. I have a really intense fear of failure on …	embarrassment	ashamed	mortified	unhappy	anxious	embarassed	2	1	59							1
	1							When my parent i took a trip to mexico, my sister had spilled chocolate milk in the back seat of the truck. I was sleeping but when i woke up she had place the container in my hands, so when i woke up my parents saw that i had the bootle. They hot so andgry at me that trough the whole trip i was to sit alone without talking, they ignorn me the whole trip ,i was sad	Alone	ingnored	betrayed	revenge	furious	mad	1	4	19				1
		1						The experience that comes to mind is when I was hired for my current job. I desperately wanted to work for this company, but did not think that my skills were strong enough for them to consider hiring me. I was very nervous before my interview. When I went to the office for the interview, I was amazed at how friendly everyone was to me. I was still uneasy, but so impressed with their friendliness…	Proud	excited	Nervous	Happy	Elated	Excited	1	1	37		1					1
	1							It seems that my entire family takes advantage of me, at times. My mother is a spendthrift, and recently I loaned her a substantial sum of money so she could pay her bills on time. However, she never paid me back, and this put me in a very bad situation, as I was unable to meet my own obligations as a result. When I asked her about it, she claimed she did not have the money to repay me, but I soo…	Anger	Sadness	Frustration	Disbelief	Impatience	pissed off	1	1	33				1
						1		An emotional experience i remembered was when my girlfriend and i broke up. deep down i knew this was going to happen because of how she had been acting in the weeks prior but i tried to tell myself that i was just being too critical or seeing things that weren't there. i had intense anxiety daily; especially when i would text my girlfriend and not get a response for the entire day. i still can f…	anxiety	nervousness	fear	sadness	depression	devastated	1	1	29							1	1
	1							I was attempting to sell some prodcuts to a client, for a good commission, but my boss decided he wanted the commission, and stepped in. He told me to go to the back stock area, and start working there, and he would finish up with the client. Not only was this extremely disrespectful, I viewed it as stealing, as that was my sale, and the money that was coming from it should have gone to me, and n…	anger	hatred	annoyance	disrespect	frustration	pissed	1	1	32				1
		1						it was the day my daughter was born. I had went to the hospital for a routine Dr appt, they ran a couple tests and decided that they were going to admit me evn though I wasnt due to deliver her for another week and a half. I called my husband at work and told him to get to the hospital NOW! my mom was already with me so I had the 2 people who meant the most to me either with me or on their	LOVE	anxiety	joy	adoration	uncertainty	blessed	2	1	34
							1	I was in a karate class at the local community college, and was forced to pair up with someone else to do exercises and sparring. The person I was paired up with smelled strongly of marijuana smoke. This repulsed and disgusted me because of experiences with family who smoke the drug. Although difficult to complete the task, I did so and felt strange for several hours afterwards	disgust	sadness	stress	anger	none	stressed	1	1	24				1	1
		1						I was very happy when my daughter was born. She was a very unexpect surprise because I did not think she would survive once she was born. I had several complications during labor where I honestly thought she was going to die inside me. When I held her for the first time I was overwhelmed with emotion and couldn't stop crying. I remember my tear drops landing on her tiny hands and face. I remember…	happiness	elated	thrilled	joy	smiling	happy	2	1	42			1				1
	1							It was my wedding preperation. I ordered all of the bridesmaids dresses online. When ordering, I had to ask the ladies their sizes. After purchasing all of the dresses, one of the women let me know that the dress I ordered for them didn't fit. She didn't tell me her true size, because she was much larger than she wanted to admit to me. So, the women didn't have the same dresses. I had to order he…	Frustration	Aggravated	Rushed	Worried	Upset	frustrated	2	1	31				1
							1	In my kitchen one day, I walked in to find that someone had lifted a garbage bag from a party the previous night. The bag had bursted open, and the contents were all over the floor. Bits of food, trash, rubble, liquids, all mixed together into the floor, laying in a pile. The sight was disgusting enough to make me nearly throwup. However, my friend who entered the room did in fact, vomit, which a…	Disgust	Sadness	Anxiety	Repulsion	Irritation	sickened	1	1	24				1	1
	1							I was driving around with my boyfriend and his friends, when I needed to use the bathroom. My boyfriend's friend drove to Dunkin Donuts so I could use their bathroom. When I walked in the woman told me that the bathrooms were closed. I went back to the car and told them what happened and my boyfriend got angry. He went inside and yelled at the woman. We left, and the woman called the cops. She li…	Terrified	Angry	Scared	Confused	Nervous	terrified	2	1	35				1		1	1
					1			The memories of my father's death is sufficient enough for me to be emotionally traumatize. My emotion at that time is deeply sad and sorrowful. The agony of one's love lost really being felt by all of my senses. It was the most dark moment's in my journey in this world . The torture is greatly felt within . The world stops in me for a while. I keep myself intact while I am adjusting to the event…	sorrow	sad	gloomy	lonely	downhearted	saddened	1	3	50			1	1				1
			1					My brother called me to tell me he had been robbed at gunpoint. I remember feeling faint, and the room spinning. I knew that the culprit knew where we lived, and after a few moments of feeling queasy for my brother, I began to feel nauseated for myself and family. After several moments, I realized that despite how fragile my legs felt, I was pacing manically around the room. My brother had alread…	sympathy	fear	longing	fright	regret	in shock	2	1	21				1		1
		1						when after getting marks in final examinations of my F.sc. I applied in different universities but my marks were very low. i wanted to get admission in my favorite university but due to my less numbers i was afraid of. but one day i got a call from that universty that i have been selected for. i was so excited due to joy and happiness that i started jumping around and started yelling with joy. i …	happiness	joy	enjoyment	thankfull	none	happy	1	3	32		1
				1				My childhood best friend and I were talking on my bed, sharing our thoughts/feelings about various events that had happened throughout our lives. We were laughing a lot and crying (good tears). I felt like she really understood me and that we've always had a strong emotional connection. We shared our childhood dreams for our future and compared them to how we are actually living. We also were sha…	happiness	nostalgia	content	peaceful	blissful	happy	2	6	29			1
			1					I got into a fight witha neighbor that accused my brother of thef, despite him having landlord authorization for fixinga broken door on the front of the building. I ended up getting into a fight with hima nd nearly taking his block off with a lead pipe. The only emotions I remember feeling were anger and this guy needs to die long before I do. Looking back I wish cooler ehads would have prevailed…	anger	rage				pissed	1	1	30
							1	My mom was suffering from dementia, and her physical and mental health were going downhill. One of her physical problems was that she couldn't always make it to the bathroom in time. I came home from work one day to find she had pooped all over her bedroom carpet. It was physically repulsive because the smell made me gag and it was also hard for me mentally and emotionally because I knew she coul…	sadness	frustration	anger	nausea	none	angry at myself for feeling angry at my mother.	2	1	48					1			1
		1						The time was when i finally got my weight under 200 pounds.My granmother died from cancer about a year ago and just from everything that was going on i ended up eating alot of fast food and not working out as much and i gained about 30 pounds.Once i finally hit 210 i felt terrible not only physically but mentally.I ended up getting streth marks and all but about a month later i lost 12 pounds.I f…	Acomplished	happy	driven	zelous	powerful	amazing	1	1	19		1
				1				When I asked my wife to marry me. We were walking the canal enjoying a nice day and having a picnic. I remember being nervous and excited at the same time. Once I asked her and she said yes we were both so happy. Smiling, kissing, hugging. A feeling of joy and relief came over us as we knew we were set to be with each other for the rest of our lives.	Love	joy	relief	happiness	nervous	happy	1	1	31		1	1
					1			It was the time that I lost my grandmother. She was the closest person to me and when I lost her I wasnt here to be able to say goodbye to her. It hurt me a lot as I wanted that chnce but since no one tol dme about it, I didnt knwo until it was too late. I was hurt for various reasons but she was the most important one. I thought I deserved to know this for sure and I didnt. It took me a while to…	sadness	loss	disppointment	hurt	angry	upset	1	4	23								1
				1				The event I think of is when my fiance proposed to me. We have been together for three and a half years and are very close. The proposal was a surprise and was the most special moment of my life so far. Thinking about that memory makes me feel very loved and very lucky to have found someone like him. It brings up feelings of excitement for the upcoming wedding and for our future. When the proposa…	Joy	Happiness	Elation	Exhilaration	Excitement	happy!	2	1	24	1	1	1
							1	My emotional experience happened earlier today. I spotted my friend cheating on his girlfriend as he was on a date with another girl. I was frankly repulsed by the action that I saw. I knew the other girl so I knew it was not a coincidence as said girl had been quite interested him in the past. I later confirmed that he did cheat on her, but that is besides the point. After assuming the worst (an…	Shock	Disgust	Sadness	Anger	Frustration	angry	2	1	19				1	1
					1			With my mother unexpectedly passing, I was in a total shock. I was told over the phone and I was nothing less than a walking zombie for almost a week. I was completely lost and basically operated on "auto pilot". I don't remember much from that week, including driving 4 hours home for the funeral nor the funeral.	Devastated	Sad	Grief	Lost	none	lost, sad and don't know what to do.	1	1	50								1
		1						The event that I thought of was during this summer a couple months ago, when me and my boyfriend went to the Outer Banks of North Carolina for a vacation. It was a wonderful and relaxing trip. I had never been to the Outer Banks before, and it was really exciting to see the landscape. It was surrounded by beaches every which way you looked. It was a little surreal, and I felt like I was on my own…	Calm	Relaxation	Intimacy	Joy	Peace	excited	2	1	23		1
				1				the events of the emotional experience. my sister-in-law found out she was pregnant. gosh she was thrilled. i really dislike these exercises because i don't write very nor am i very in touch with my emotional state. I don't want to tell anyone else about that experience either. so now i'm just writing words in this box so that i can meet the minimum number of characters. i'm sorry if this throws …	squishy	flotation	submursed	intriqued	flatulant	petulant	1	1	32
						1		I was throwing snowballs at cars and hit one right in front of a cop car. I was dreading when my mom would get home and the punishment I'd receive once she got home. I felt very scared and very anxious. The cop came into my driveway and asked for my info and whatnot. he later called my home and explained what had happened to my mom. It was scary to hear that phone ring. So after the call she talk…	Terror	Anxious	Jittery	Afraid	Depressed	Terrified	1	1	25							1
						1		When my ex-husband and I separated, I felt that divorce was imminent. I didn't want to loose my time with my daughter. I wanted her to live with me permanently. I was scared for her future being split between two households. I was afraid for how both she and I would adjust to her living between two households. I continually felt like I was ruining my daughter's chances for a positive, happy futur…	Fear	Guilt	Worry	Anxiety		scared	2	1	32							1
				1				why did i get married since a batchelor is so much fun n freedom that there r no word to cxplain it every time i think abt it makes me cry and wich i can go back in time	life	karma	zindagi	none	none	lost	1	3	32
					1			My mother passed away from cancer a few years back. Overcome with bitterness and sadness, was completely unsure what was going to happen afterwards. Still felt miserable the day after, still trying to make sense of what happened before and figuring out what we were going to do at this point. We knew the day would come, but we were still filled with emotions.	Sadness	Bitterness	Loneliness	none	none	Sad, lonely	1	1	21								1
1								There was a time when I thought that I would be getting a raise a work. I had an meeting set up with my boss and there was a position that opened up that I was qualified for. I entered her office to get my evaluation and speak with her. The evaluation went well. She told me a lot of goods things about my work, my attendance, and my quality. I then brought up my idea of moving up into a higher pos…	Rejected	Depressed	Dejected	Sad	Unqualified	depressed	1	3	27								1
						1		Apon arriving home someone we didn't know stopped us and said that our dogs bark all day long and if we do not correct the issue we will be evicted. It was such raw feeling of angry and being nervous all at once. I do not want to get rid of my dogs and I will not. Made us even more mad because we don't know who the person is that confronted us and he was very aggressive and almost threatening	anger	sad	frustration	nervous	none	pissed	2	1	27				1			1
				1				Last year I had the opportunity to go to a live race. One of my favorite drivers just happened to be speaking at an even for his sponsor. That day was raining and cold but it didn't matter one bit. It was pure sunshine as soon as he came to the stage. He is known for being more than cordial and polite to his fans. he takes the time to pose for pictures and sign autographs. Being only a few feet a…	awestruck	mesmerized	happy	star struck	giddy	mesmerized	2	1	45		1
					1			I once lost my radio. It was stolen directly out of the house. The radio was a wonderful piece of machinery that was very loud and efficient. I delivered the sound that I so loved right into my ears with the greatest quality. I had an emotional attachment to the radio. It was of the highest quality. The radio is still visually memorable to me.	sadness	Digust	Comtempt	Anger		mad	1	2	23			1					1
					1			the death of my older and only brother 35 years ago. he died a young man of 29 his died trying to find away so our family could escape poverty, I feel personally responsible I did try to stop him from doing what he did. he was one of the few people in this life that cared for me as an individual. he was just as much as a father as a brother. I still miss him greatly.	loss	sadness	powerlessness	emptiness	isolation	powerless	1	2	61								1
	1							I remember a time at work when I completed a task and one of my other co-workers got the credit for it. I was so excited about coming up with this idea and when our boss found out about it my co-worker was the one who had told him that it was her who had come up with the idea. I was not very happy at all. I work so hard on this project. I can't excactly go to my boss and tell her that it was me w…	Frustrated	Let down	devestated	sad	upset	mad!	2	1	36				1
			1					I was working as a supervisor in an automotive assembly plant. I had a phone call at home about a worker of mine. He had threatened to come to work with a gun and kill me. Our plant had a similar incident occur before I worked there, about 5 years previously. One of my other workers overheard him say this and brought it to the attention of others. I was moved to another shift, and this employee d…	Panic	fear	anger	nervousness	none	I am panicking!	2	1	41				1		1
						1		The tires on the car were getting bald and needed to be replaced. My boyfriend said they would last for months more, which I totally disagreed with. The anxiety of driving that vehicle juast about drove me batty. Two days later, POW went that tire	anxiety	stress	anger	fear	apprehension	pissed	2	1	50						1	1
			1					I was stopped at a stop sign when a sport utility vehichle was coming up on me at a high rate of speed. It didn't see me stopped at the stop sign or the stop sign. Unlucky for me it hit me at 35 miles an hour. I was hit. I got a epensive ride to the hospital and a 45K hospital bill in the mail plus other expemsies. It took me a long time to heal and I am still going throught the process or gettin…	fear	rush	excitement	tradgity	panic	fearful	1	6	40				1		1
					1			When I was in my senior year of high school, I got a call one Sunday morning that one of my best friends had died in a car accident. He was driving drunk and using drugs. The car crushed him completely from the waist down. I haven't driven drunk since that day. He was a good person.	Grief	Sadness	Pain	Loss	Heartache	Sad	2	2	33			1					1
							1	Today I started cleaning the kitchen and opened up the trash can in order to take the trash out. I just ate breakfast and the smell was absolutely disgusting. I tried to to get my bearings for about two seconds, but the urge to vomit was too strong. Before I knew it I had thrown up in my mouth. This was extremely unexpected and it took about two minutes for me to feel normal again. I have about t…	Nausea	Disgust	Disdain	Unclean	Nasty	disgusted	1	1	23					1
							1	My sister has an eating disorder and the event occurred at a time that she had started recovery and had a relapse moment. She had thrown up in the bathtub so that my parents wouldn't hear her throw up in the toilet and the tub would not drain. I had to help her clean up the tub in her desperation and the experience was incredibly disgusting, upsetting, and one of the worst experiences of my life.	disgust	repulsion	none	none	none	upset	2	1	27				1	1
			1					I used to live in Baltimore and heard stories of people being mugged or beaten for no reason. I often walked by myself alone at night and would look behind me at every step. Sometimes if I saw someone coming I would cross the street or walk in the middle of the street. Nothing ever happened to me personally, but I still feel extremely afraid and in danger whenever I think about walking after dark…	fear	danger	anxiety	none	none	afraid	2	1	28						1
					1			When I found out how sick my cousin Marisa was and when she finally passes I felt like my life was over. i had lost my best friend...who was I going to talk to know? She would never get to play with my son or visit wtih me. I should have gone to visit more but never had the time or enough money for the plane tickets. Now she is gone and I felt hopeless. what was I going to do now?	sadness	sadness	regret	hoplessness	anger	heartbroken	2	1	36				1				1
					1			5 years ago I was getting ready to run errands on a Sat. and my wife said I have something to tell you. I want a divorce and there is nothing you can do or say to change my mind. 32 years and she wants to just walk away. I was devastated and in total shock. I did not understand how or why she would do this. I had done nothing wrong and worshipped the ground she walked on. I did everything for her…	devastation	shock	dismay	hurt	angry	shocked at what she did. I am devasted and if not for my kids I would probably be suicidal. How can I find the strength to keep going.	1	1	57
						1		I hadn't prepared for my final math exam. I went in thinking I would be fine because I only needed to pass the class for credit. I spent the entire 3 hours panicked, unhappy, and wholly petrified that I would fail because it was much harder than I anticipated. I remember looking around the room to see how other people were doing...watching as they left. I felt ashamed that I had not prepared and …	ANXIETY	Fear	Shame	Embarrassment	none	screwed, unprepared, going to fail.	2	1	27							1
							1	I suppose the best event I can go with is when I was younger and relatively new to the internet. I managed to find myself onto what some call a "shock site". A website full of graphic images, none of them pleasant to look at. Many of the images were gory or sexual, or terribly, both. I recall feeling sick and distressed by the images I saw. It makes me wonder what type of people put a site togeth…	Distress	Sick	Frightened	Alarmed	Disturbed	sickened	1	1	25				1	1
		1						A couple years ago, I went to a fairly large Magic:The Gathering tournament at a local store. There were quite a few players there(50+) and the prizes were pretty good. I wasn't the best player in the room or anything, but I could hold my own. I wasn't expecting to win the whole thing, but I kept winning matchups through a combination of luck and timing. As the tournament stretched on, I was nerv…	happy	joy	hope	excited	estatic	pumped	1	1	33	1	1
1								I was at a bon voyage party at the local pub. I was going to Europe the next day for 3 weeks, so we had some drinks. My best friend joked around, saying it was a "deportation party" we had chicken wings and joked around. Then we ran into an old friend from college and told jokes. He gave me an address of a friend in Amsterdam to visit.	excitement	happy	blissful	anticipation	hyper	excited	2	1	39		1
		1						My son-in-law, called me one evening and asked it would like to go to the Casino. I of course said yes, but why tonight? I seems the game of Stray Poker had the biggest pay of of all time. I didn't care about that I just love to gamble. We played for a while, but it was hard to get a seat, so I played the slots for a while and then found a seat next to John. All of a sudden he got jumpy and asked…	disbelief	happy	crazy	excited	stunned	thrilled, I am almost speechless.	2	1	72		1
			1					It was a very bad storm when a tornado had touched down near my house. I was very scared that it would hit the house and I would be injured. I spent the entire night curled up in the bathtub with pillows and blankets. I remember listening for how loud the wind was getting outside and my heart felt like it was beating out of my chest. I just kept hoping the storm would pass quickly and the tornado…	afraid	worry	none	none	none	scared	2	1	28						1	1
		1						One of the best experiences of my life was the graduation of my children because this was my main goal when I came to this country.This was as a personal achievement.I understand that a college degree is a very important thing for the future of a person and the life of my children will be much more favorable with a good education.	pride	happiness	satisfaction	achievement	tranquility	pride	1	4	56		1
				1				I took my 5 year old grandaughter to the zoo , just her and I went . I was able to give her my full attention . Just seeing how much she enjoyed herself gave me so much pleasure . That day created so many memories for me and I hope it did her also . She loved the childrens petting zoo and all the baby animals there . We laughed at baby goats playing . I can not think of the last time I had enjoye…	JOY	happiness	excitment	love	none	Happy	2	1	54		1	1
							1	Years ago, I was working at at convenient store on Third Shift. We had this drunk come in every night, he himself smelled awful. But, it was one night that he came in and decided he was going to throw up what he had for dinner that night. At that time, there was no such thing as plastic gloves in the convenient store because we did not make food. So, I had to clean this up. Even with paper towels…	Disgust	Dirty	Creepy	Nauseas	Angry	Disgusted	2	1	56					1
				1				An experience I am thinking of is when my significant other made things official. It was a surprise and caught me off guard. He was so romantical and very thoughtful. It really blew me away. I have never felt closer to him than on this specific day. He surprised me at the beach with tons of roses and boxes of chocolates. He knew that chocolates were my favorite. I was absolutely surprised and I c…	LOVE	joy	emotional	surprised	happy	SHOCKED	2	3	26		1	1
		1						/ when I turned 16 I begged my mother to let me get my license on my birthday. She took off work that day and we left to go get my license. I was so excited and nervous at the same time. I took my driving test and I passed, I was so excited and happy to finally get my license. It had made my birthday the best one ever.	happiness	excited	thankful	passionate	lucky	excited!	2	1	48		1
		1						When I was younger I really wanted a dog and due to the restriction we could have one. One day my dad got home with a little black puppy and I just melted and fell in love, I was so extremely happy and every time I remember I feel the happiness and joy of how I felt that day.	happy	joy	wonderful	none	none	happy	2	4	24		1	1
1								i had just found out that a family relative was dead. it was horrible, the worst feeling ever. to know that you can never talk to that person again is the worst. i didnt know what i was going to do with my life. at the funeral i was a mess, and didnt even speak to anyone. i still have alot of regreats about that day and how i handled the situation. death is something that scares me a lot and even…	saddness	scared	alone	endless	forever	stupid	1	1	24
